# Supplementary material for: Bottom-Up Approach to the Discovery of Clinically Relevant Biomarker Genes: The Case of Colorectal Cancer
Source: MDPI journal article supplement (doi:10.3390/cancers14112654), 2022-05-27
Supplement: s1 [file s1]

**Table S4.** The genes identified in the TRRUST database being regulated by the TFs, selected using the 10 genes from the training set

| A2M     | AHR     | APOM    | BACE1   | BRCA2   | CCL19  | CD58     | CEBPE   | COL1A2  | CTGF     | CYP3A5   | DLL4     |
|---------|---------|---------|---------|---------|--------|----------|---------|---------|----------|----------|----------|
| ABCA1   | ACIDA   | APP     | BACE2   | BRD4    | CCL2   | CD6      | CENPH   | COL2A1  | CTNNB1   | CYP3A7   | DLX5     |
| ABCA3   | AKAP12  | AQP3    | BACH1   | BRD7    | CCL20  | CD68     | CENPW   | COL4A2  | CTNNBIP1 | CYP46A1  | DMRT1    |
| ABCB1   | AKR1B1  | AR      | BAD     | BR3     | CCL22  | CD69     | CERS2   | COL7A1  | CTPS1    | CYP4F12  | DNAAF4   |
| ABCB8   | AKR1C2  | AREG    | BAG1    | BSG     | CCL3   | CD74     | CES1    | COMP    | CTSB     | CYP7A1   | DNAJB4   |
| ABCC1   | AKR1C3  | ARF1    | BAG2    | BST1    | CCL4   | CD79A    | CETP    | COP55   | CTSD     | CYP7B1   | DNASE1   |
| ABCC3   | AKR1C4  | ARF6    | BAG3    | BTG1    | CCL5   | CD80     | CFB     | CORO1C  | CTSG     | CYP61    | DNASE2   |
| ABCC6   | AKT1    | ARG1    | BAMBI   | BTG2    | CCNA1  | CD82     | CFH     | COX1    | CTSL     | DAB2     | DNM3     |
| ABCG2   | AKT2    | ARG2    | BATF3   | BTG3    | CCNA2  | CD83     | CFI     | COX6A1  | CTSV     | DACH1    | DNMT1    |
| ABCG5   | ALAS2   | ARL6IP5 | BAX     | BTBK    | CCNB1  | CD86     | CFLAR   | COX7C   | CUX1     | DACT3    | DNMT3A   |
| ABCG8   | ALB     | ARNT    | BBC3    | BTRC    | CCNB2  | CD8B     | CFTR    | CPD     | CX3CL1   | DAP3     | DNMT3B   |
| ACAN    | ALDH1A1 | ARNT2   | BCAR1   | BTS1    | CCNC   | CD99     | CGA     | CPEB1   | CXADR    | DAPK1    | DOK1     |
| ACAT1   | ALDH1A3 | ARNTL   | BCAS3   | C1QBP   | CCND1  | CDAN1    | CGB3    | CPT1B   | CXCL1    | DAPK2    | DPYSL2   |
| ACAT2   | ALDOA   | ASAH1   | BCL11A  | C1QTNF5 | CCND2  | CDC20    | CGB5    | CR2     | CXCL10   | DBF4     | DRAM1    |
| ACE     | ALKBH2  | ASAP2   | BCL2    | C4A     | CCND3  | CDC25C   | CHAT    | CRABP1  | CXCL12   | DBH      | DRD1     |
| ACE2    | ALOX12  | ASCL1   | BCL2A1  | C4B     | CCNE1  | CDC34    | CHEK1   | CRABP2  | CXCL14   | DBI      | DRD2     |
| ACHE    | ALOX15  | ASCL2   | BCL2L1  | CA12    | CCNE2  | CDC42BPG | CHEK2   | CREB1   | CXCL2    | DCBLD2   | DRG2     |
| ACO1    | ALOX15B | ASF1B   | BCL2L11 | CA2     | CCNG2  | CD6      | CHGA    | CREB3   | CXCL5    | DCC      | DROSHA   |
| ACTA1   | ALOX5   | ASNS    | BCL3    | CA9     | CCNT1  | CDC73    | CHI3L1  | CREBBP  | CXCL8    | DCK      | DSC2     |
| ACTC1   | ALOX5AP | ASPH    | BCL6    | CABLES1 | CCR1   | CDCA7    | CHRNB4  | CREM    | CXCR2    | DCN      | DST      |
| ACTN4   | ALPI    | ASPM    | BDKRB1  | CACNA1H | CCR2   | CDH1     | CHRNE   | CRH     | CXCR4    | DCT      | DUSP1    |
| ACVRL1  | ALPL    | ASPN    | BDKRB2  | CAD     | CCR3   | CDH11    | CHST4   | CRHBP   | CXCR5    | DDB1     | DUSP10   |
| ADA     | AMACR   | ASS1    | BDNF    | CALB1   | CCR4   | CDH17    | CHUK    | CRHR1   | CXXC5    | DD2      | E2F1     |
| ADAM10  | AMH     | ATAD2   | BECN1   | CALD1   | CCR5   | CDH2     | CIAO1   | CRISP1  | CYBB     | DDC      | E2F2     |
| ADAM17  | ANAPC4  | ATF2    | BEST1   | CAMP    | CCR7   | CDH3     | CIC     | CRISP3  | CYFIP2   | DDIT3    | E2F3     |
| ADAM23  | ANGPT1  | ATF3    | BEX2    | CAPN10  | CD14   | CDH5     | CITA    | CRMP1   | CYP11A1  | DDIT4    | E2F6     |
| ADAMTS1 | ANGPT2  | ATF4    | BGLAP   | CAPNS1  | CD151  | CDH6     | CISH    | CRP     | CYP11B1  | DDX18    | E2F7     |
| ADAMTS5 | ANGPTL4 | ATF5    | BGN     | CARD8   | CD163  | CDK1     | CITED2  | CRTC1   | CYP11B2  | DDX21    | EAF2     |
| ADGRB1  | ANKRD1  | ATF7    | BHLHE40 | CARM1   | CD19   | CDK2     | CKM     | CRX     | CYP17A1  | DDX58    | EAPP     |
| ADGRE5  | ANPEP   | ATG5    | BHLHE41 | CASP1   | CD1D   | CDK20    | CKS2    | CRYAB   | CYP19A1  | DEFA1    | EBI3     |
| ADH6    | ANTXR1  | ATG7    | BHMT    | CASP2   | CD2    | CDK4     | CLCN5   | CRYGA   | CYP1A1   | DEFA3    | EBNA1BP2 |
| ADIPOQ  | ANXA8   | ATM     | BID     | CASP3   | CD22   | CDK5R1   | CLDN2   | CRYGB   | CYP1A2   | DEFA5    | ECM1     |
| ADM     | APAF1   | ATP1B1  | BIRC2   | CASP7   | CD24   | CDK6     | CLDN3   | CSF1    | CYP1B1   | DEFA6    | ECT2     |
| ADORA1  | APC     | ATP2A2  | BIRC3   | CASP8   | CD28   | CDKN1A   | CLDN7   | CSF1R   | CYP24A1  | DEFB1    | EDN1     |
| ADORA2A | APCS    | ATP2A3  | BIRC5   | CASP9   | CD2AP  | CDKN1B   | CLEC4C  | CSF2    | CYP27A1  | DEFB103A | EDNRB    |
| ADORA3  | APEX1   | ATP2C1  | BLK     | CASR    | CD33   | CDKN1C   | CLEC4G  | CSF2RA  | CYP27B1  | DEFB4A   | EFNB3    |
| ADRA1A  | APH1A   | ATP5F1A | BLM     | CAT     | CD34   | CDKN2A   | CLK3    | CSF3R   | CYP2B6   | DEK      | EGF      |
| ADRA2B  | APLN    | AURKA   | BLMH    | CAV1    | CD36   | CDKN2B   | CLOCK   | CSH1    | CYP2C19  | DHCR24   | EGFR     |
| ADRB2   | APOA1   | AURKB   | BMI1    | CBFB    | CD38   | CDKN3    | CLU     | CSH2    | CYP2C8   | DHFR     | EGLN1    |
| ADRB3   | APOA2   | AVP     | BMP2    | CBS     | CD3G   | CDO1     | CNMD    | CSNK2A1 | CYP2C9   | DHRS2    | EGLN3    |
| AFP     | APOA5   | AXIN2   | BMP4    | CBX5    | CD4    | CDX2     | CNTNAP2 | CSRP1   | CYP2D6   | DIRAS3   | EGR1     |
| AGER    | APOB    | AXL     | BMP7    | CCAR2   | CD40   | CEACAM1  | COL10A1 | CST5    | CYP2E1   | DISC1    | EGR2     |
| AGR2    | APOBR   | B2M     | BNIP3   | CCK     | CD40LG | CEACAM5  | COL11A2 | CSTA    | CYP2F1   | DKK1     | EIF2AK1  |
| AGT     | APOC3   | B4GALT1 | BPI     | CCL11   | CD44   | CEBPA    | COL18A1 | CTBP2   | CYP2J2   | DKK3     | EIF2AK2  |
| AGTR1   | APOE    | B4GALT5 | BRCA1   | CCL13   | CD46   | CEBPB    | COL1A1  | CTCF    | CYP3A4   | DKK4     | ELANE    |

**Table S4.** Cont. The genes identified in the TRRUST database being regulated by the TFs, selected using the 10 genes from the training set

|          |         |         |         |         |           |          |         |         |         |          |        |
|----------|---------|---------|---------|---------|-----------|----------|---------|---------|---------|----------|--------|
| ELF1     | EXT1    | FGFBP1  | FZD1    | GP6     | HDAC9     | HP       | IFNAR1  | ILK     | KISS1   | LGALS3BP | MBD2   |
| ELF3     | EYA3    | FGFR1   | GABPA   | GP9     | HDC       | HPGD     | IFNB1   | IMPDH2  | KISS1R  | LGALS9   | MBP    |
| ELF4     | EZH2    | FGFR3   | GAD1    | GPA33   | HECA      | HPSE     | IFNG    | ING1    | KIT     | LGR5     | MC2R   |
| ELK1     | EZR     | FGG     | GADD45A | GPNUMB  | HEPH      | HRAS     | IFNGR1  | ING4    | KLF1    | LHB      | MCAM   |
| ELK4     | F10     | FGL1    | GADD45G | GPR39   | HES1      | HRH1     | IFNLR1  | INO80   | KLF10   | LIN28A   | MCL1   |
| ELMO3    | F12     | FHIT    | GALNT3  | GPX1    | HEY1      | HSD11B2  | IGF1    | INS     | KLF11   | LIN28B   | MCM10  |
| ELN      | F2R     | FHL2    | GALT    | GPX4    | HFE       | HSD17B1  | IGF1R   | INSM1   | KLF12   | LIPC     | MCM2   |
| ENG      | F3      | FKBP4   | GAPDH   | GREB1   | HGF       | HSD17B11 | IGF2    | INSR    | KLF17   | LIPE     | MCM3   |
| ENO1     | F7      | FLI1    | GAS2    | GRHL1   | HIC1      | HSD17B2  | IGF2BP1 | IPO7    | KLF2    | LITAF    | MCM4   |
| EOMES    | F8      | FLT1    | GAST    | GRIN1   | HIF1A     | HSD17B6  | IGF2BP2 | IRF1    | KLF4    | LMO2     | MCM5   |
| EP300    | F9      | FLT3    | GATA1   | GRIN2B  | HINFP     | HSD3B2   | IGF2R   | IRF2    | KLF5    | LMTK2    | MCM6   |
| EPAS1    | FAAH    | FLT4    | GATA2   | GRIP1   | HIP1      | HSF1     | IGFBP1  | IRF3    | KLF6    | LNPEP    | MCM7   |
| EPB41L3  | FABP2   | FMN2    | GATA3   | GRK2    | HIPK2     | HSP90AA1 | IGFBP3  | IRF4    | KLK1    | LOR      | MCM8   |
| EPB41L4B | FABP4   | FMO3    | GATA4   | GRM2    | HIST1H4L  | HSP90AB1 | IGFBP4  | IRF7    | KLK2    | LOX      | MCPH1  |
| EPCAM    | FABP5   | FMR1    | GATA5   | GRPR    | HK3       | HSP90B2P | IGFBP5  | IRF8    | KLK3    | LPAR2    | MDC1   |
| EPHA2    | FABP6   | FN1     | GATA6   | GSK3A   | HLA-A     | HSPA1A   | IGH     | IRF9    | KLK4    | LPL      | MDM2   |
| EPHB2    | FADD    | FOLH1   | GBA     | GSK3B   | HLA-B     | HSPA1B   | IGK     | IRS2    | KLRK1   | LRBA     | MDM4   |
| EPO      | FAF1    | FOS     | GBP1    | GSPT1   | HLA-C     | HSPA4    | IKKE    | ISG20   | KPNA2   | LRIG2    | MECOM  |
| EPOR     | FAM162A | FOSL1   | GC      | GSTM1   | HLA-DOB   | HSPA5    | IL10    | ISYNA1  | KPNB1   | LRRN3    | MED1   |
| ERAP1    | FANCA   | FOXA1   | GCG     | GSTP1   | HLA-DQB1  | HSPA8    | IL11    | ITGA2   | KRAS    | LSS      | MEF2A  |
| ERAP2    | FAP     | FOXA2   | GCK     | GTF2B   | HLA-DRA   | HSPB1    | IL12A   | ITGA2B  | KRT12   | LTB      | MEF2C  |
| ERBB2    | FAS     | FOXC1   | GCLC    | GTF2F1  | HLA-DRB1  | HSPD1    | IL12B   | ITGA6   | KRT14   | LTBP1    | MEF2D  |
| ERBB3    | FASLG   | FOXC2   | GCM1    | GTF2I   | HLA-E     | HTRA1    | IL13    | ITGAD   | KRT16   | LTBP4    | MEFV   |
| ERCC1    | FASN    | FOXE1   | GDAP1   | GUCA2B  | HLA-F     | HTRA2    | IL15    | ITGAV   | KRT17   | LTC4S    | MEIS1  |
| ERCC2    | FAT1    | FOXF1   | GDF15   | GUCY1B1 | HLA-G     | HTT      | IL17A   | ITGAX   | KRT18   | LXN      | MELTF  |
| ERCC5    | FBLN1   | FOXL1   | GDF5    | GUCY2C  | HLTF      | HYAL1    | IL17C   | ITGB1   | KRT19   | LY96     | MEP1A  |
| EREG     | FBN1    | FOXM1   | GDNF    | GUSB    | HLX       | HYOU1    | IL1A    | ITGB2   | KRT5    | LYL1     | MET    |
| ERG      | FBP1    | FOXO1   | GFAP    | H19     | HMGAI     | IAPP     | IL1B    | ITGB3   | KRT7    | MACROD1  | MGMT   |
| ERICD    | FBXO32  | FOXO3   | GFER    | H2AFX   | HMGAI     | IBSP     | IL1R1   | ITGB3BP | L1CAM   | MAD1L1   | MGP    |
| ERO1A    | FCER1A  | FOXO4   | GF11    | HAMP    | HMGCS1    | ICAM1    | IL1R2   | ITGB8   | L1TD1   | MAD2L1   | MIA    |
| ERP44    | FCER2   | FOXP1   | GGP51   | HAS2    | HMMR      | ICAM2    | IL1RN   | IVL     | LAMA1   | MAML1    | MICA   |
| ERVW-1   | FCGR1A  | FOXP3   | GH1     | HAX1    | HMOX1     | ICAM3    | IL2     | JAG1    | LAMA3   | MAOA     | MICB   |
| ESR1     | FCGR2B  | FRMD5   | GIN3    | HBA1    | HNF1A     | ID1      | IL21    | JAK1    | LAMTOR5 | MAOB     | MID1   |
| ESR2     | FCGR3B  | FSHB    | GIPR    | HBA2    | HNF4A     | ID2      | IL23A   | JAK2    | LAPTM4B | MAP1LC3A | MIF    |
| ESRRA    | FCGRT   | FSHR    | GJA1    | HBB     | HNRNPA1   | ID4      | IL24    | JUN     | LBP     | MAP1LC3B | MIR202 |
| ESRRG    | FDPS    | FST     | GK      | HBE1    | HNRNPA2B1 | IDE      | IL27    | JUNB    | LCAT    | MAP2     | MIR708 |
| ETF1     | FDXR    | FSTL3   | GKN2    | HBEGF   | HOMER3    | IDO1     | IL2RA   | JUP     | LCK     | MAP3K1   | MITF   |
| ETS1     | FGA     | FTH1    | GLI1    | HBP1    | HOPX      | IDO2     | IL2RB   | KAT5    | LCN2    | MAP3K14  | MKI67  |
| ETS2     | FGF1    | FTH1P18 | GLI2    | HCFC1   | HOXA10    | IER3     | IL3     | KCNJ11  | LCT     | MAP3K5   | MKNK2  |
| ETV1     | FGF10   | FURIN   | GLS     | HCK     | HOXA2     | IFI16    | IL32    | KCNN2   | LDHA    | MAP4     | MME    |
| ETV3     | FGF19   | FUS     | GML     | HDAC1   | HOXA4     | IFIT3    | IL4     | KDR     | LDLR    | MAPK1    | MMP1   |
| ETV4     | FGF2    | FUT2    | GNAS    | HDAC2   | HOXA9     | IFITM3   | IL5     | KHSRP   | LEF1    | MAPK3    | MMP10  |
| ETV6     | FGF4    | FUT3    | GNLY    | HDAC3   | HOXB13    | IFITM5   | IL5RA   | KIF2C   | LEFTY1  | MAPK8    | MMP12  |
| EVPL     | FGF7    | FUT4    | GNMT    | HDAC4   | HOXB4     | IFNA1    | IL6     | KIR2DL3 | LEP     | MAT2A    | MMP13  |
| EXO1     | FGF8    | FXR2    | GNRH2   | HDAC7   | HOXB7     | IFNA13   | IL7     | KIR3DL1 | LGALS3  | MBD1     | MMP14  |

**Table S4.** Cont. The genes identified in the TRRUST database being regulated by the TFs, selected using the 10 genes from the training set

|        |         |        |        |          |         |          |         |          |         |         |        |
|--------|---------|--------|--------|----------|---------|----------|---------|----------|---------|---------|--------|
| MMP17  | NAT1    | NPC1L1 | PAX6   | PIAS3    | PPP2CA  | PTPRC    | RORA    | SELL     | SLC29A1 | SPPI    | TBX21  |
| MMP2   | NBN     | NPHS1  | PAX8   | PIGR     | PPP2R2B | PTPRO    | RP1     | SEMA6A   | SLC2A1  | SPRR1B  | TBX3   |
| MMP20  | NCAM1   | NPHS2  | PBK    | PIK3CA   | PRAM1   | PTPRZ1   | RPA2    | SERBP1   | SLC2A4  | SPRR3   | TBXA2R |
| MMP28  | NCF1    | NPPA   | PC     | PIM1     | PRAME   | PTTG1    | RPL3    | SERPINB5 | SLC39A1 | SPRY1   | TBXAS1 |
| MMP3   | NCF2    | NPPB   | PCK1   | PIN1     | PRC1    | PVR      | RPRM    | SERPINB9 | SLC46A1 | SPRY2   | TBXT   |
| MMP7   | NCOR1   | NPY    | PCK2   | PIP      | PRDM1   | RAB3A    | RPS3A   | SERPINC1 | SLC4A2  | SRC     | TCEAL1 |
| MMP9   | NDC80   | NQO1   | PCNA   | PIP5K1C  | PRDM2   | RACGAP1  | RPS6KA3 | SERPINE1 | SLC5A1  | SRD5A3  | TCF4   |
| MINAT1 | NDRG1   | NQO2   | PCSK1  | PKLR     | PRDX3   | RAD51    | RPTOR   | SERPINF1 | SLC5A5  | SRF     | TCF7L2 |
| MPG    | NDRG2   | NR0B1  | PCSK2  | PLAC1    | PRDX5   | RAD51B   | RRM1    | SESN1    | SLC5A8  | SRPX    | TCN2   |
| MPL    | NEDD4   | NR0B2  | PCSK6  | PLAGL1   | PRG3    | RAD9A    | RRM2    | SESN3    | SLC6A4  | SRSF1   | TDGF1  |
| MSH2   | NEFL    | NR1H3  | PCSK9  | PLAT     | PRKAB1  | RAG1     | RRM2B   | SETD2    | SLC6A6  | SRY     | TDO2   |
| MSH6   | NEIL1   | NR1H4  | PCYT1A | PLAU     | PRKCA   | RAG2     | RRP1B   | SETDB1   | SLC9A1  | SSTR2   | TDRD1  |
| MSL1   | NELL2   | NR1I2  | PDCD2  | PLAUR    | PRKCE   | RAP1A    | RS1     | SF1      | SLC9A2  | ST3GAL1 | TEK    |
| MSMB   | NES     | NR1I3  | PDCD4  | PLD1     | PRKN    | RARA     | RUNX1   | SFN      | SLC9A3  | ST3GAL3 | TERF1  |
| MSR1   | NEUROG3 | NR2C2  | PDE6B  | PLIN2    | PRL     | RARB     | RUNX1T1 | SFRP1    | SLPI    | ST3GAL4 | TERT   |
| MST1   | NF1     | NR2F1  | PDE7A  | PLK1     | PRODH   | RARG     | RUNX2   | SFRP5    | SMAD3   | ST3GAL5 | TF     |
| MT1G   | NFE2    | NR2F6  | PDGFA  | PLK3     | PROM1   | RASGEF1B | RUNX3   | SFTPB    | SMAD4   | STAR    | TFAM   |
| MTA3   | NFKB1   | NR3C1  | PDGFB  | PLSCR1   | PROS1   | RASGRP1  | RXFP2   | SFTPD    | SMAD6   | STAT1   | TFAP2A |
| MTDH   | NFKB2   | NR4A1  | PDGFC  | PMAIP1   | PRSS50  | RASSF1   | RXRA    | SGPL1    | SMAD7   | STAT2   | TFAP4  |
| MTF1   | NGF     | NR4A3  | PDGFRA | PMEPA1   | PSCA    | RB1      | S100A10 | SH2D1A   | SMARCA4 | STAT3   | TFDP1  |
| MTTP   | NGFR    | NR5A1  | PDGFRB | PML      | PSEN1   | RBBP8    | S100A11 | SH3BP2   | SMARCB1 | STIM1   | TFE3   |
| MUC1   | NKX2-1  | NR5A2  | PDHA1  | PNRC1    | PSEN2   | RBL1     | S100A2  | SHBG     | SMARCD3 | STIP1   | TFF1   |
| MUC17  | NKX3-1  | NRAS   | PDIAG  | PNRC2    | PSG3    | RBL2     | S100A4  | SHC1     | SMN1    | STK11   | TFF2   |
| MUC2   | NKX6-1  | NRF1   | PDK1   | PODXL    | PSG5    | RBM38    | S100A6  | SHH      | SNAI1   | STMN1   | TFF3   |
| MUC3A  | NLK     | NRP1   | PDK2   | POLB     | PSIP1   | RCC1     | S100A7  | SHMT1    | SNAI2   | STS     | TFPI2  |
| MUC4   | NLRG4   | NRXN1  | PDK4   | POLD1    | PSMB10  | RECK     | S100A9  | SI       | SNAP91  | SULT1E1 | TFRC   |
| MUC5AC | NME1    | NT5E   | PDX1   | POLD2    | PSMB5   | RECQL4   | S100B   | SLAH1    | SNRPN   | SUMO1   | TG     |
| MUC5B  | NME3    | NTRK1  | PEA15  | POLH     | PSMB9   | REEP5    | S100P   | SIM2     | SOC51   | SUMO2   | TGFA   |
| MUC6   | NMNAT2  | NTS    | PEBP1  | POLK     | PSMC5   | REG4     | S1PR1   | SIRT1    | SOC52   | SURF1   | TGFB1  |
| MVP    | NMU     | OAS1   | PEG10  | POLR3D   | PTAFR   | RELA     | SAA1    | SIRT6    | SOC53   | SURF2   | TGFB2  |
| MXD1   | NOD1    | OAT    | PEG3   | POR      | PTBP1   | RELB     | SAA2    | SIVA1    | SOC57   | SYK     | TGFB3  |
| MXI1   | NOD2    | ODC1   | PELP1  | POSTN    | PTEN    | RELN     | SALL2   | SKIL     | SOD1    | SYN1    | TGFB3  |
| MYB    | NOL7    | OGG1   | PENK   | POU2F1   | PTGS1   | REN      | SALL4   | SKP2     | SOD2    | SYN2    | TGFB3  |
| MYBL2  | NOLC1   | OGN    | PER1   | POU3F2   | PTGES   | REST     | SAP30   | SLC10A1  | SOX10   | TAC3    | TGFB2  |
| MYC    | NOS2    | OPRM1  | PERP   | POU4F1   | PTGS1   | RET      | SART3   | SLC10A2  | SOX18   | TAF12   | TGM4   |
| MYCN   | NOS3    | OSM    | PF4    | POU5F1   | PTGS2   | RETN     | SAT1    | SLC15A1  | SOX2    | TAF1A   | TH     |
| MYD88  | NOTCH1  | OXT    | PFDN4  | PPARA    | PTH     | RGS10    | SATB1   | SLC16A1  | SOX4    | TAF7    | THBD   |
| MYH10  | NOTCH4  | OXR    | PFKFB3 | PPARD    | PTHLH   | RHOB     | SCARB1  | SLC16A1  | SOX7    | TAGLN   | THBS1  |
| MYH11  | NOTUM   | P4HA1  | PFKFB4 | PPARG    | PTMA    | RLN1     | SCD     | SLC19A3  | SOX9    | TALDO1  | THRSP  |
| MYH9   | NOV     | PADI1  | PFKP   | PPARGC1A | PTN     | RLN2     | SCN9A   | SLC1A3   | SP1     | TAP1    | THY1   |
| MYOCD  | NOX1    | PADI3  | PGF    | PPBP     | PTP4A1  | RNASE2   | SCNN1A  | SLC20A1  | SP100   | TAP2    | TIAL1  |
| MZF1   | NOX4    | PARP1  | PGK1   | PPIG     | PTPA    | RNASEL   | SCT     | SLC22A2  | SP3     | TAPBP   | TIMP1  |
| NAB2   | NOX5    | PAX2   | PGR    | PPM1D    | PTPN1   | RNF144A  | SCTR    | SLC22A6  | SPARC   | TAT     | TIMP2  |
| NAMPT  | NPAS2   | PAX3   | PHB    | PPP1R13B | PTPN13  | RNF2     | SDHB    | SLC22A8  | SPAST   | TBP     | TIMP3  |
| NANOG  | NPAT    | PAX5   | PHLDA1 | PPP1R3C  | PTPN6   | ROR1     | SELE    | SLC26A3  | SPI1    | TBX18   | TJP1   |

**Table S4.** Cont. The genes identified in the TRRUST database being regulated by the TFs, selected using the 10 genes from the training set

|         |           |          |        |        |         |          |       |       |       |        |        |
|---------|-----------|----------|--------|--------|---------|----------|-------|-------|-------|--------|--------|
| TK1     | TNFAIP3   | TOMM34   | TPMT   | TSIX   | UBA7    | UGT1A4   | USP21 | VIM   | WNT4  | XRCC1  | ZNF750 |
| TLR10   | TNFAIP6   | TOMM70   | TPT1   | TUBB3  | UBB     | UGT1A7   | USP26 | VIP   | WNT7B | YBX1   |        |
| TLR2    | TNFRSF10A | TOP1     | TRA    | TWIST1 | UBC     | UGT1A8   | USP7  | VLDLR | WRN   | YWHAQ  |        |
| TLR3    | TNFRSF10B | TOP1MT   | TRAF6  | TWIST2 | UBE2C   | UGT1A9   | UTRN  | VWF   | WT1   | YY1    |        |
| TLR6    | TNFRSF11B | TOP2A    | TRAP   | TXN    | UBE2D3  | UGT2B15  | UXT   | WAS   | WTAP  | ZEB1   |        |
| TLR9    | TNFRSF12A | TOP3A    | TRH    | TXN2   | UBE2I   | UGT2B17  | VCAM1 | WASF3 | WWOX  | ZFHX3  |        |
| TLX1    | TNFRSF1B  | TP53     | TRIM22 | TXNIP  | UBE2S   | UGT2B7   | VCAN  | WDFY4 | XAF1  | ZFP36  |        |
| TMEM71  | TNFRSF21  | TP53BP2  | TRPS1  | TYK2   | UCN     | UHRF1    | VDR   | WEE1  | XBP1  | ZFP42  |        |
| TMPO    | TNFSF10   | TP53I3   | TRPV6  | TYMP   | UCP1    | UHRF1BP1 | VEGFA | WFDC2 | XIAP  | ZNF175 |        |
| TMPRSS2 | TNFSF11   | TP53INP1 | TSC1   | TYMS   | UCP2    | ULBP1    | VEGFB | WISP2 | XPA   | ZNF205 |        |
| TNC     | TNFSF13B  | TP63     | TSC2   | TYR    | UGT1A1  | ULK1     | VEGFD | WNT11 | XPC   | ZNF217 |        |
| TNF     | TOE1      | TP73     | TSHR   | U2AF2  | UGT1A10 | UPP1     | VHL   | WNT2B | XPO1  | ZNF350 |        |
