# Supplementary material for: Bottom-Up Approach to the Discovery of Clinically Relevant Biomarker Genes: The Case of Colorectal Cancer
Source: MDPI journal article supplement (doi:10.3390/cancers14112654), 2022-05-27
Supplement: s1 [file s1]

**Table S13.** Expression of 42 selected mRNA tested in the excised CRC (patient 2).

| Biomarker | Normalised expression ratios * |            |            |         | Log-transformed normalised expression ratios |            |            |         | Confidence Limits |        | P-value |         |
|-----------|--------------------------------|------------|------------|---------|----------------------------------------------|------------|------------|---------|-------------------|--------|---------|---------|
|           | 1st repeat                     | 2nd repeat | 3rd repeat | Average | 1st repeat                                   | 2nd repeat | 3rd repeat | Average | SD                | SEM    |         | From    |
| BAD       | 9.840                          | 10.010     | 10.370     | 10.073  | 3.2987                                       | 3.3234     | 3.3743     | 3.3321  | 0.0315            | 0.0182 | 3.2538  | 3.4104  |
| TLR2      | 9.160                          | 8.990      | 8.890      | 9.013   | 3.1953                                       | 3.1683     | 3.1522     | 3.1720  | 0.0178            | 0.0103 | 3.1277  | 3.2162  |
| BCL2L1    | 8.840                          | 8.740      | 9.010      | 8.863   | 3.1440                                       | 3.1276     | 3.1715     | 3.1477  | 0.0181            | 0.0105 | 3.1027  | 3.1927  |
| BID       | 5.910                          | 6.260      | 6.300      | 6.157   | 2.5632                                       | 2.6462     | 2.6554     | 2.6216  | 0.0415            | 0.0239 | 2.5185  | 2.7246  |
| PDGFRB    | 4.700                          | 4.950      | 4.550      | 4.733   | 2.2327                                       | 2.3074     | 2.1859     | 2.2420  | 0.0501            | 0.0289 | 2.1176  | 2.3664  |
| EGF       | 4.110                          | 4.940      | 4.750      | 4.600   | 2.0391                                       | 2.3045     | 2.2479     | 2.1972  | 0.1141            | 0.0659 | 1.9137  | 2.4807  |
| BAX       | 3.450                          | 5.730      | 4.270      | 4.483   | 1.7866                                       | 2.5185     | 2.0942     | 2.1331  | 0.3001            | 0.1732 | 1.3876  | 2.8786  |
| IRS2      | 4.340                          | 4.540      | 4.490      | 4.457   | 2.1177                                       | 2.1827     | 2.1667     | 2.1557  | 0.0277            | 0.0160 | 2.0870  | 2.2244  |
| CDK2      | 4.120                          | 4.100      | 4.340      | 4.187   | 2.0426                                       | 2.0356     | 2.1177     | 2.0653  | 0.0371            | 0.0214 | 1.9730  | 2.1576  |
| CDK6      | 3.680                          | 3.590      | 4.340      | 3.870   | 1.8797                                       | 1.8440     | 2.1177     | 1.9471  | 0.1215            | 0.0701 | 1.6453  | 2.2489  |
| CCND1     | 3.860                          | 3.400      | 3.040      | 3.433   | 1.9486                                       | 1.7655     | 1.6041     | 1.7727  | 0.1407            | 0.0813 | 1.4231  | 2.1224  |
| CCNE1     | 3.780                          | 3.510      | 2.950      | 3.413   | 1.9184                                       | 1.8115     | 1.5607     | 1.7635  | 0.1499            | 0.0865 | 1.3911  | 2.1359  |
| PDGFC     | 3.160                          | 3.030      | 3.550      | 3.247   | 1.6599                                       | 1.5993     | 1.8278     | 1.6957  | 0.0967            | 0.0558 | 1.4556  | 1.9358  |
| CDK4      | 3.300                          | 2.890      | 3.320      | 3.170   | 1.7225                                       | 1.5311     | 1.7312     | 1.6616  | 0.0923            | 0.0533 | 1.4321  | 1.8910  |
| VEGFC     | 3.170                          | 2.900      | 2.900      | 2.990   | 1.6645                                       | 1.5361     | 1.5361     | 1.5789  | 0.0605            | 0.0350 | 1.4285  | 1.7293  |
| MMP2      | 2.240                          | 2.620      | 2.860      | 2.573   | 1.1635                                       | 1.3896     | 1.5160     | 1.3564  | 0.1458            | 0.0842 | 0.9941  | 1.7186  |
| TSC2      | 2.710                          | 2.370      | 2.280      | 2.453   | 1.4383                                       | 1.2449     | 1.1890     | 1.2907  | 0.1068            | 0.0617 | 1.0254  | 1.5561  |
| CREB1     | 2.270                          | 2.350      | 2.470      | 2.363   | 1.1827                                       | 1.2327     | 1.3045     | 1.2400  | 0.0500            | 0.0289 | 1.1157  | 1.3642  |
| CCNA1     | 2.320                          | 2.590      | 2.120      | 2.343   | 1.2141                                       | 1.3730     | 1.0841     | 1.2237  | 0.1181            | 0.0682 | 0.9302  | 1.5172  |
| MAPK3     | 2.410                          | 2.260      | 2.270      | 2.313   | 1.2690                                       | 1.1763     | 1.1827     | 1.2093  | 0.0423            | 0.0244 | 1.1043  | 1.3144  |
| TGFB1     | 1.910                          | 1.910      | 1.930      | 1.917   | 0.9336                                       | 0.9336     | 0.9486     | 0.9386  | 0.0071            | 0.0041 | 0.9210  | 0.9562  |
| EGFR      | 1.660                          | 1.520      | 1.510      | 1.563   | 0.7312                                       | 0.6041     | 0.5945     | 0.6433  | 0.0623            | 0.0360 | 0.4885  | 0.7980  |
| PIK3CA    | 1.720                          | 1.550      | 1.400      | 1.557   | 0.7824                                       | 0.6323     | 0.4854     | 0.6334  | 0.1212            | 0.0700 | 0.3322  | 0.9346  |
| STAT1     | 1.570                          | 1.270      | 1.730      | 1.523   | 0.6508                                       | 0.3448     | 0.7908     | 0.5955  | 0.1862            | 0.1075 | 0.1328  | 1.0581  |
| MDM2      | 1.830                          | 1.010      | 1.440      | 1.427   | 0.8718                                       | 0.0144     | 0.5261     | 0.4708  | 0.3522            | 0.2034 | -0.4043 | 1.3459  |
| CDH1      | 1.560                          | 1.050      | 1.190      | 1.267   | 0.6415                                       | 0.0704     | 0.2510     | 0.3210  | 0.2384            | 0.1376 | -0.2712 | 0.9132  |
| CDKN1A    | 1.570                          | 1.020      | 1.160      | 1.250   | 0.6508                                       | 0.0286     | 0.2141     | 0.2978  | 0.2608            | 0.1506 | -0.3501 | 0.9458  |
| SHC1      | 1.240                          | 1.280      | 1.230      | 1.250   | 0.3103                                       | 0.3561     | 0.2987     | 0.3217  | 0.0248            | 0.0143 | 0.2601  | 0.3833  |
| KRAS      | 1.100                          | 0.940      | 1.650      | 1.230   | 0.1375                                       | -0.0893    | 0.7225     | 0.2569  | 0.3420            | 0.1974 | -0.5927 | 1.1065  |
| TGFB3     | 0.570                          | 1.570      | 1.470      | 1.203   | -0.8110                                      | 0.6508     | 0.5558     | 0.1319  | 0.6678            | 0.3856 | -1.5272 | 1.7909  |
| CDKN1B    | 1.300                          | 0.920      | 1.310      | 1.177   | 0.3785                                       | -0.1203    | 0.3896     | 0.2159  | 0.2378            | 0.1373 | -0.3748 | 0.8067  |
| HRAS      | 1.410                          | 0.930      | 1.130      | 1.157   | 0.4957                                       | -0.1047    | 0.1763     | 0.1891  | 0.2453            | 0.1416 | -0.4202 | 0.7985  |
| PIK3R3    | 1.130                          | 1.010      | 1.250      | 1.130   | 0.1763                                       | 0.0144     | 0.3219     | 0.1709  | 0.1256            | 0.0725 | -0.1412 | 0.4830  |
| E2F3      | 1.440                          | 1.100      | 0.760      | 1.100   | 0.5261                                       | 0.1375     | -0.3959    | 0.0892  | 0.3779            | 0.2182 | -0.8497 | 1.0282  |
| SMAD4     | 1.100                          | 0.940      | 1.210      | 1.083   | 0.1375                                       | -0.0893    | 0.2750     | 0.1077  | 0.1502            | 0.0867 | -0.2654 | 0.4809  |
| CCND2     | 0.720                          | 0.900      | 1.560      | 1.060   | -0.4739                                      | -0.1520    | 0.6415     | 0.0052  | 0.4688            | 0.2706 | -1.1594 | 1.1698  |
| CCND3     | 1.160                          | 0.860      | 1.110      | 1.043   | 0.2141                                       | -0.2176    | 0.1506     | 0.0490  | 0.1903            | 0.1099 | -0.4238 | 0.5218  |
| CTNNB1    | 0.790                          | 0.800      | 0.970      | 0.853   | -0.3401                                      | -0.3219    | -0.0439    | -0.2353 | 0.1355            | 0.0782 | -0.5720 | 0.1014  |
| FN1       | 0.830                          | 0.740      | 0.960      | 0.843   | -0.2688                                      | -0.4344    | -0.0589    | -0.2540 | 0.1537            | 0.0887 | -0.6358 | 0.1277  |
| FGFR1     | 0.860                          | 0.610      | 0.670      | 0.713   | -0.2176                                      | -0.7131    | -0.5778    | -0.5028 | 0.2091            | 0.1207 | -1.0224 | 0.0167  |
| TGFB2     | 0.610                          | 0.500      | 0.590      | 0.567   | -0.7131                                      | -1.0000    | -0.7612    | -0.8248 | 0.1254            | 0.0724 | -1.1364 | -0.5131 |
| BCL2      | 0.300                          | 0.140      | 0.190      | 0.210   | -1.7370                                      | -2.8365    | -2.3959    | -2.3231 | 0.4518            | 0.2609 | -3.4456 | -1.2006 |

\* Gene expression ratios (tumor v matching normal tissue) normalised to the endogenous levels of three reference RNAs (housekeeping gene GAPDH mRNA, 18S and 28S rRNAs). Measured in triplicate. Significantly upregulated mRNA (red), downregulated mRNAs (blue).
