# Supplementary material for: Bottom-Up Approach to the Discovery of Clinically Relevant Biomarker Genes: The Case of Colorectal Cancer
Source: MDPI journal article supplement (doi:10.3390/cancers14112654), 2022-05-27
Supplement: s1 [file s1]

**Table S7.** The 193 biomarkers identified following interrogation of TF and pathways databases, using the 10 genes from the training set.

|         |        |        |         |         |          |        |         |        |          |           |        |
|---------|--------|--------|---------|---------|----------|--------|---------|--------|----------|-----------|--------|
| ACTN4   | BCL2   | CCNG2  | CHUK    | FABP4   | GSK3B    | IL4    | MAP3K14 | PDGFA  | PTPN1    | SMAD3     | TP53I3 |
| ADGRB1  | BCL2L1 | CD28   | CREB1   | FAS     | HIF1A    | IL5    | MAPK1   | PDGFB  | PTPN6    | SMAD4     | TSC2   |
| ADORA1  | BID    | CD40   | CREBBP  | FCER1A  | HK3      | IL6    | MAPK3   | PDGFC  | RAD51    | SRC       | TSHR   |
| ADRB2   | BRCA2  | CD40LG | CSF2    | FGF2    | HLA-DOB  | ILK    | MAPK8   | PDGFRA | RB1      | STAT1     | VEGFC  |
| ADRB3   | BTB    | CD80   | CSNK2A1 | FGFR1   | HLA-DQB1 | INS    | MDM2    | PDGFRB | RELA     | STAT3     | WAS    |
| AICDA   | BTRC   | CD82   | CTNNB1  | FGFR3   | HLA-DRA  | INSR   | MET     | PDHA1  | RET      | SYK       | WASF3  |
| AKT1    | CASP3  | CD86   | CXCL12  | FLT3    | HLA-DRB1 | IRS2   | MMP2    | PDK1   | RPRM     | TCF7L2    |        |
| AKT2    | CASP8  | CDH1   | CXCR4   | FN1     | HRAS     | ISYNA1 | MSH2    | PFKP   | RRM2     | TGFB1     |        |
| ALOX5   | CASP9  | CDK2   | DCC     | FOS     | HSPB1    | JAK1   | MSH6    | PIGR   | RRM2B    | TGFB2     |        |
| ALOX5AP | CCNA1  | CDK4   | DDB2    | FOXO3   | IGF1     | JAK2   | MYC     | PIK3CA | SERPINB5 | TGFB3     |        |
| APAF1   | CCNB1  | CDK6   | E2F1    | GADD45A | IGF1R    | JUN    | NF1     | PIK3R3 | SESN3    | TGFBR1    |        |
| APC     | CCNB2  | CDKN1A | E2F2    | GCK     | IGFBP3   | KDR    | NFKB1   | PLD1   | SFN      | TGFBR2    |        |
| ATM     | CCND1  | CDKN1B | E2F3    | GLI1    | IL10     | KIT    | NLK     | PPM1D  | SHC1     | TJP1      |        |
| AXIN2   | CCND2  | CDKN2A | EGF     | GLI2    | IL13     | KRAS   | NOS3    | PRKCA  | SHH      | TLR2      |        |
| AXL     | CCND3  | CGA    | EGFR    | GLS     | IL15     | LDHA   | NPY     | PTEN   | SIAH1    | TNF       |        |
| BAD     | CCNE1  | CHEK1  | ELK1    | GNAS    | IL2      | LEF1   | NRAS    | PTGS1  | SIRT6    | TNFRSF10B |        |
| BAX     | CCNE2  | CHEK2  | EP300   | GRK2    | IL3      | LIPE   | NTRK1   | PTGS2  | SLC2A1   | TNFSF13B  |        |
