# Supplementary material for: Bottom-Up Approach to the Discovery of Clinically Relevant Biomarker Genes: The Case of Colorectal Cancer
Source: MDPI journal article supplement (doi:10.3390/cancers14112654), 2022-05-27
Supplement: s1 [file s1]

**Table S8.** The genes identified in the TRRUST database being regulated by the TFs, selected using the 10 genes from the validation set

|         |         |         |          |         |        |          |         |          |          |          |         |
|---------|---------|---------|----------|---------|--------|----------|---------|----------|----------|----------|---------|
| A2M     | AK4     | AREG    | BATF3    | C1QBP   | CCNE1  | CDC42BPG | CHEK1   | CRHBP    | CYP11A1  | DHFR     | EGFR    |
| ABCA1   | AKAP12  | ARF1    | BAX      | C4A     | CCNG2  | CDC6     | CHEK2   | CRHR1    | CYP11B1  | DIRAS3   | EGLN1   |
| ABCA3   | AKR1B1  | ARF6    | BBC3     | C4B     | CCNT1  | CDC73    | CHGA    | CRISP1   | CYP11B2  | DISC1    | EGLN2   |
| ABCB1   | AKR1C2  | ARG1    | BCAR1    | CA12    | CCR1   | CDCA7    | CHI3L1  | CRISP3   | CYP17A1  | DKK1     | EGLN3   |
| ABCB8   | AKR1C3  | ARG2    | BCAS3    | CA2     | CCR2   | CDH1     | CHRNB4  | CRMP1    | CYP19A1  | DKK3     | EGR1    |
| ABCC1   | AKT1    | ARL6IP5 | BCL11A   | CA9     | CCR3   | CDH11    | CHRNE   | CRP      | CYP1A1   | DKK4     | EGR2    |
| ABCC3   | AKT2    | ARNT    | BCL2     | CABIN1  | CCR5   | CDH2     | CHST4   | CRTC1    | CYP1A2   | DLG4     | EGR3    |
| ABCC6   | ALAS2   | ARNT2   | BCL2A1   | CABLES1 | CCR6   | CDH3     | CHUK    | CRX      | CYP1B1   | DLL4     | EIF2AK1 |
| ABCG2   | ALDH1A1 | ARNTL   | BCL2L1   | CACNA1H | CCR7   | CDH5     | CIAO1   | CRYAB    | CYP24A1  | DLX5     | EIF2AK2 |
| ACAN    | ALDH1A2 | ASAH1   | BCL2L1L1 | CAD     | CD14   | CDK1     | CIC     | CSF1     | CYP27A1  | DMD      | ELANE   |
| ACAT1   | ALDH1A3 | ASAP2   | BCL3     | CALB1   | CD151  | CDK2     | CIITA   | CSF1R    | CYP27B1  | DMPK     | ELF1    |
| ACE     | ALDOA   | ASCL2   | BCL6     | CALD1   | CD163  | CDK20    | CISH    | CSF2     | CYP2A6   | DMRT1    | ELF3    |
| ACE2    | ALKBH2  | ASF1B   | BDKRB1   | CAMP    | CD19   | CDK4     | CITED2  | CSF3R    | CYP2B6   | DNAAF4   | ELF4    |
| ACHE    | ALOX12  | ASNS    | BDKRB2   | CAPN6   | CD1D   | CDK5R1   | CKM     | CSH1     | CYP2C19  | DNAJB4   | ELK1    |
| ACO1    | ALOX15  | ASPH    | BDNF     | CARD8   | CD2    | CDK6     | CKS2    | CSN2     | CYP2E1   | DNASE2   | ELK4    |
| ACRV1   | ALOX15B | ASPM    | BECN1    | CARM1   | CD22   | CDKL5    | CLDN2   | CSNK2A1  | CYP2F1   | DNM3     | ELMO3   |
| ACTA1   | ALOX5   | ASPN    | BEX2     | CASP1   | CD24   | CDKN1A   | CLDN3   | CSRP1    | CYP2J2   | DNMT1    | ELN     |
| ACTC1   | ALOX5AP | ASS1    | BGLAP    | CASP3   | CD28   | CDKN1B   | CLDN7   | CST5     | CYP3A4   | DNMT3A   | EMX2    |
| ACTG2   | ALPI    | ASXL1   | BGN      | CASP7   | CD2AP  | CDKN1C   | CLK3    | CSTA     | CYP3A5   | DNMT3B   | ENG     |
| ACTN4   | AMACR   | ATAD2   | BHLHE22  | CASP8   | CD33   | CDKN2A   | CLOCK   | CTBP2    | CYP3A7   | DOK1     | ENO1    |
| ACVRL1  | AMH     | ATF1    | BHLHE40  | CASP9   | CD34   | CDKN2B   | CLU     | CTCF     | CYP7A1   | DPYSL2   | ENPP2   |
| ADA     | ANAPC4  | ATF2    | BHLHE41  | CASR    | CD36   | CDKN2C   | COL10A1 | CTGF     | CYP7B1   | DRAM1    | EP300   |
| ADAM10  | ANG     | ATF3    | BHMT     | CAT     | CD38   | CDKN3    | COL11A2 | CTLA4    | CYR61    | DRD2     | EPAS1   |
| ADAM17  | ANGPT1  | ATG5    | BID      | CAV1    | CD3G   | CDX2     | COL18A1 | CTNNB1   | DAB2     | DRG2     | EPCAM   |
| ADAM23  | ANGPT2  | ATM     | BIRC2    | CBFB    | CD4    | CEACAM1  | COL1A1  | CTNNBIP1 | DACT3    | DROSHA   | EPHA2   |
| ADAMTS5 | ANGPTL4 | ATP1B1  | BIRC3    | CBS     | CD40   | CEACAM5  | COL1A2  | CTPS1    | DAPK1    | DSG4     | EPO     |
| ADGRB1  | ANKRD1  | ATP2A2  | BIRC5    | CBX5    | CD40LG | CEBPA    | COL2A1  | CTSB     | DAPK2    | DST      | EPOR    |
| ADGRE5  | ANPEP   | ATP2A3  | BLK      | CCAR2   | CD44   | CEBPB    | COL4A2  | CTSD     | DBF4     | DUSP1    | EPSTI1  |
| ADH6    | ANTXR1  | ATP2C1  | BLM      | CCK     | CD46   | CEBPE    | COL4A3  | CTSL     | DBH      | DUSP10   | ERAP1   |
| ADIPOQ  | ANXA8   | ATP5F1A | BLMH     | CCL11   | CD58   | CEL      | COL7A1  | CTSV     | DBI      | DUX4     | ERAP2   |
| ADIPOR1 | APAF1   | ATXN7   | BMI1     | CCL13   | CD68   | CELSR3   | COMP    | CUX1     | DCBLD2   | E2F1     | ERBB2   |
| ADIPOR2 | APC     | AURKA   | BMP2     | CCL19   | CD69   | CENPH    | COP1    | CX3CL1   | CK       | E2F2     | ERBB3   |
| ADM     | APCS    | AURKB   | BMP4     | CCL2    | CD74   | CENPW    | COP5    | CXADR    | DCN      | E2F3     | ERCC1   |
| ADORA1  | APEX1   | AVP     | BMP7     | CCL20   | CD79A  | CEP55    | COX1    | CXCL1    | DCT      | E2F6     | ERCC2   |
| ADORA2A | APH1A   | AXIN2   | BNIP3    | CCL22   | CD80   | CERS2    | COX6A1  | CXCL10   | DCB1     | E2F7     | ERCC4   |
| ADORA3  | APLNR   | AXL     | BRCA1    | CCL3    | CD82   | CES1     | COX7C   | CXCL12   | DB2      | EAF2     | ERCC5   |
| ADRA1A  | APOA1   | B2M     | BRCA2    | CCL4    | CD83   | CETP     | CPD     | CXCL14   | DDIT3    | EAPP     | EREG    |
| ADRA2B  | APOA2   | B4GALT1 | BRD7     | CCL5    | CD86   | CFB      | CPEB1   | CXCL2    | DDIT4    | EBI3     | ERG     |
| ADRB2   | APOA5   | B4GALT5 | BRIP1    | CCL7    | CD8A   | CFH      | CPT1B   | CXCL5    | DDR2     | EBNA1BP2 | ERICD   |
| ADRB3   | APOB    | BABAM2  | BR3      | CCNA1   | CD8B   | CFI      | CR2     | CXCL8    | DDX18    | ECM1     | ERN1    |
| AFP     | APOBR   | BACE1   | BSG      | CCNA2   | CD99   | CFLAR    | CRABP1  | CXCR2    | DDX21    | ECT2     | ERO1A   |
| AGER    | APOC3   | BACE2   | BST1     | CCNB1   | CDAN1  | CFTR     | CRABP2  | CXCR4    | DDX58    | EDA      | ERP29   |
| AGR2    | APOE    | BACH1   | BTG1     | CCNB2   | CDC20  | CGA      | CREB1   | CXCR5    | DEFB1    | EDEM2    | ERP44   |
| AGT     | APOM    | BAD     | BTG2     | CCNC    | CDC25A | CGB3     | CREB3   | CXCR5    | DEFB103A | EDN1     | ERVW-1  |
| AGTR1   | APP     | BAG2    | BTG3     | CCND1   | CDC25B | CGB5     | CREBBP  | CYBB     | DEFB4A   | EDNRB    | ESR1    |
| AHR     | AQP3    | BAK1    | BTK      | CCND2   | CDC25C | CHAC1    | CREM    | CYFIP2   | DEK      | EFNB3    | ESR2    |
| AICDA   | AR      | BAMBI   | BT51     | CCND3   | CDC34  | CHAT     | CRH     | CYLD     | DHCR24   | EGF      | ESRRA   |

**Table S8.** Cont. The genes identified in the TRRUST database being regulated by the TFs, selected using the 10 genes from the validation set

|         |         |         |         |           |         |         |         |          |          |        |         |
|---------|---------|---------|---------|-----------|---------|---------|---------|----------|----------|--------|---------|
| ESRRG   | FGF4    | FZD1    | GPX4    | HIP1      | HSPA8   | IL1R1   | IVL     | LAMC2    | MAOB     | MIR708 | MYH9    |
| ETNK2   | FGF7    | GOS2    | GREB1   | HIPK2     | HSPB1   | IL1RN   | JAG1    | LAMTOR5  | MAP1LC3A | MITF   | MYL9    |
| ETS1    | FGF8    | GABPA   | GRHL1   | HIST2H2BE | HSPH1   | IL2     | JAK1    | LAPTM4B  | MAP1LC3B | MKI67  | NAB2    |
| ETS2    | FGFBP1  | GAD1    | GRHL2   | HLA-A     | HTRA1A  | IL21    | JAK2    | LBP      | MAP3K1   | MKNK2  | NAMPT   |
| ETV1    | FGFR1   | GADD45A | GRIN1   | HLA-B     | HTRA2   | IL23A   | JUN     | LCA1     | MAP3K5   | MME    | NANOG   |
| ETV3    | FGFR3   | GADD45G | GRIN2B  | HLA-C     | HTT     | IL24    | JUNB    | LCK      | MAP4     | MMP1   | NAT1    |
| ETV4    | FGG     | GALNT3  | GRIP1   | HLA-DOB   | HYAL1   | IL27    | JUND    | LCN2     | MAPK1    | MMP10  | NBN     |
| ETV6    | FGL1    | GAPDH   | GRK2    | HLA-DQA1  | HYOU1   | IL2RA   | KAT5    | LCT      | MAPK3    | MMP12  | NCAM1   |
| EVPL    | FHLT    | GAS2    | GRM2    | HLA-DQB1  | IBSP    | IL2RB   | KDR     | LDHA     | MAPK8    | MMP13  | NCF2    |
| EXO1    | FHL2    | GAST    | GRPR    | HLA-DRA   | ICAM1   | IL3     | KHSRP   | LDLR     | MAT2A    | MMP14  | NCOR1   |
| EXT1    | FKBP4   | GATA1   | GSK3A   | HLA-DRB1  | ID1     | IL32    | KIF2C   | LEF1     | MBD1     | MMP17  | NDC80   |
| EYA3    | FLI1    | GATA2   | GSK3B   | HLA-E     | ID2     | IL4     | KIR2DL3 | LEP      | MBD2     | MMP2   | NDRG1   |
| EZH2    | FLT1    | GATA3   | GSTP1   | HLA-F     | ID4     | IL5     | KIR3DL1 | LGALS3   | MBP      | MMP20  | NDRG2   |
| EZR     | FLT3    | GATA4   | GT2F2B  | HLA-G     | IER3    | IL5RA   | KISS1   | LGALS3BP | MC2R     | MMP28  | NEFL    |
| F10     | FLT4    | GATA5   | GT2F2F1 | HLTF      | IFI16   | IL6     | KISS1R  | LGALS4   | MCAM     | MMP3   | NEIL1   |
| F12     | FMN2    | GBA     | GT2F2I  | HMGA1     | IFIT3   | ILK     | KIT     | LGALS9   | MCL1     | MMP7   | NELL2   |
| F2R     | FMO3    | GBP1    | GUCY1B1 | HMGA2     | IFITM3  | IMPDH2  | KL      | LHB      | MCM10    | MMP9   | NES     |
| F3      | FMO4    | GC      | GUSB    | HMGCS1    | IFITM5  | ING1    | KLF10   | LHX3     | MCM2     | MNAT1  | NEUROG3 |
| F7      | FMR1    | GCG     | GYP A   | HMGXB4    | IFNA1   | INO80   | KLF11   | LIN28A   | MCM3     | MPG    | NF1     |
| F8      | FN1     | GCK     | H19     | HMMR      | IFNA13  | INS     | KLF12   | LIPC     | MCM4     | MPL    | NFATC1  |
| FAAH    | FOLH1   | GCLC    | H2AFX   | HMOX1     | IFNAR1  | INSM1   | KLF17   | LIPE     | MCM5     | MSH2   | NFE2    |
| FABP4   | FOS     | GCM1    | HAMP    | HNF4A     | IFNB1   | INSR    | KLF2    | LMO2     | MCM6     | MSL1   | NFKB1   |
| FABP6   | FOSL1   | GCSAM   | HAS2    | HNRNPA1   | IFNG    | IPO13   | KLF4    | LMO7     | MCM7     | MSMB   | NFKB2   |
| FAF1    | FOXA1   | GDAP1   | HAX1    | HNRNPA2B1 | IFNLR1  | IPO7    | KLF5    | LMTK2    | MCM8     | MSR1   | NGF     |
| FAM162A | FOXA2   | GDF15   | HBA1    | HOXA10    | IGF1    | IRAK2   | KLF9    | LNPEP    | MCPH1    | MST1   | NGFR    |
| FANCA   | FOXC1   | GDNF    | HBA2    | HOXA4     | IGF1R   | IRF1    | KLK1    | LOR      | MDC1     | MT1G   | NKX2-1  |
| FAP     | FOXC2   | GFAP    | HBB     | HOXA9     | IGF2    | IRF2    | KLK2    | LOX      | MDM2     | MTA1   | NKX3-1  |
| FAS     | FOX E1  | GFER    | HBD     | HOXB13    | IGF2BP1 | IRF3    | KLK3    | LPAR2    | MDM4     | MTA3   | NKX6-1  |
| FASLG   | FOX F1  | GF11B   | HBE1    | HOXB4     | IGF2BP2 | IRF7    | KLK4    | LPIN1    | MECOM    | MTDH   | NLK     |
| FAT1    | FOX L1  | GGPS1   | HBEGF   | HOXB7     | IGF2R   | IRF8    | KLK1    | LRBA     | MED1     | MTF1   | NLRC4   |
| FBLN1   | FOX M1  | GH2     | HGB1    | HP        | IGFBP1  | IRF9    | KPNA1   | LRG2     | MEF2A    | MUC1   | NME1    |
| FBN1    | FOX O1  | GIN S3  | HBP1    | HPGD      | IGFBP3  | IRS2    | KPNA2   | LRP5     | MEF2C    | MUC2   | NME3    |
| FBP1    | FOX O3  | GJA1    | HCFC1   | HPGDS     | IGFBP5  | ISG20   | KPNB1   | LRRN3    | MEF2D    | MUC3A  | NMNAT2  |
| FBXO32  | FOX P1  | GK      | HCK     | HPSE      | IGK     | ISL1    | KRAS    | LSS      | MEFV     | MUC4   | NMU     |
| FCER1A  | FOX P3  | GKN2    | HDAC1   | HRAS      | IHH     | ISYNA1  | KRT10   | LTB      | MEG3     | MUC5AC | NOL7    |
| FCER2   | FRMD5   | GLI2    | HDAC2   | HRH1      | IKBKE   | ITGA2B  | KRT12   | LTBP1    | MELTF    | MUC5B  | NOLC1   |
| FCGR1A  | FSHB    | GLS     | HDAC3   | HRK       | IL10    | ITGA5   | KRT15   | LTBP4    | MEOX2    | MVP    | NOS2    |
| FCGR2B  | FSHR    | GML     | HDAC7   | HSD11B2   | IL11    | ITGA6   | KRT16   | LTBR     | MET      | MXD1   | NOS3    |
| FCGR3B  | FST     | GNAS    | HDC     | HSD17B1   | IL12A   | ITGAD   | KRT17   | LTC4S    | MFS2A    | MXI1   | NOTCH1  |
| FCGRT   | FSTL3   | GNMT    | HERC2   | HSD17B2   | IL12B   | ITGAV   | KRT18   | LXN      | MGMT     | MYB    | NOTCH4  |
| FDPS    | FTH1P18 | GNRH1   | HES1    | HSD3B2    | IL12RB2 | ITGAX   | KRT19   | LY96     | MGP      | MYBL2  | NOV     |
| FDXR    | FTO     | GNRH2   | HEY1    | HSF1      | IL15    | ITGB1   | KRT5    | LYL1     | MIA      | MYC    | NOX1    |
| FGB     | FUS     | GP6     | HFE     | HSP90AA1  | IL17A   | ITGB2   | KRT7    | MACROD1  | MICA     | MYCBP  | NOX4    |
| FGF1    | FUT3    | GP9     | HGF     | HSP90AB1  | IL17C   | ITGB3   | L1CAM   | MAD1L1   | MICB     | MYCN   | NOX5    |
| FGF19   | FUT7    | GPA33   | HIC1    | HSPA1A    | IL18    | ITGB3BP | L1TD1   | MAD2L1   | MID1     | MYD88  | NPAS2   |
| FGF2    | FXN     | GP NMB  | HIF1A   | HSPA4     | IL1A    | ITGB4   | LAMA1   | MAML1    | MIF      | MYEF2  | NPAT    |
| FGF21   | FXR2    | GPX1    | HINFP   | HSPA5     | IL1B    | ITGB8   | LAMA3   | MAOA     | MIR202   | MYH10  | NPHS1   |

**Table S8.** Cont. The genes identified in the TRRUST database being regulated by the TFs, selected using the 10 genes from the validation set

|       |        |          |         |          |          |         |         |         |           |          |        |
|-------|--------|----------|---------|----------|----------|---------|---------|---------|-----------|----------|--------|
| NPHS2 | PBK    | PIP      | PRDM1   | RAD51    | RPS6KA3  | SH3BP2  | SNAI1   | STAT6   | TGFB1     | TRA      | VEGFA  |
| NPPA  | PBXIP1 | PIP5K1C  | PRDM2   | RAD51AP1 | RPTOR    | SHC1    | SNAI2   | STIM1   | TGFB2     | TRAP     | VEGFB  |
| NPPB  | PC     | PKLR     | PRDX3   | RAD51B   | RRM1     | SHH     | SNAI3   | STK11   | TGFB3     | TRH      | VEGFC  |
| NPY   | PKC1   | PKP3     | PRG3    | RAD9A    | RRM2     | SHMT1   | SNAP91  | STMN1   | TGFB1     | TRIB2    | VEGFD  |
| NQO1  | PKC2   | PLAC1    | PRKAB1  | RAG1     | RRM2B    | SHAH1   | SNAPC1  | STS     | TGFB2     | TRIB3    | VHL    |
| NROB1 | PCLAF  | PLAGL1   | PRKCA   | RAG2     | RRP1B    | SIGMAR1 | SNRPN   | SULT1E1 | TGFB3     | TRIM22   | VIM    |
| NRIH3 | PCNA   | PLAT     | PRKCE   | RAP1A    | RS1      | SIRT1   | SOC1    | SULT2A1 | TH        | TRPS1    | VIP    |
| NRIH4 | PCSK1  | PLAU     | PRL     | RARA     | RSP2     | SIRT2   | SOC2    | SUMO1   | THBD      | TRPV6    | VLDLR  |
| NR1I2 | PCSK2  | PLAUR    | PRNP    | RARB     | RUNX1    | SIVA1   | SOC3    | SUMO2   | THBS1     | TSC1     | VWF    |
| NR1I3 | PCSK6  | PLD1     | PRODH   | RARG     | RUNX2    | SIX3    | SOC5    | SURF1   | THBS2     | TSC2     | WASF3  |
| NR2C2 | PDE7A  | PLG      | PROM1   | RARRES1  | RUNX3    | SIX5    | SOD1    | SURF2   | TIMP1     | TSHR     | WDFY4  |
| NR2F1 | PDGFA  | PLIN2    | PROS1   | RASGEF1B | S100A10  | SIX6    | SOD2    | SYK     | TIMP2     | TSIX     | WEE1   |
| NR2F6 | PDGFB  | PLK1     | PRRX1   | RASGRP1  | S100A11  | SKP2    | SOX14   | SYN1    | TIMP3     | TUBB3    | WFS1   |
| NR3C1 | PDGFC  | PLK3     | PSCA    | RASSF1   | S100A2   | SLC10A2 | SOX18   | SYN2    | TJP1      | TWIST1   | WNT2B  |
| NR4A1 | PDGFRA | PLSCR1   | PSEN1   | RB1      | S100A4   | SLC16A1 | SOX3    | TAC3    | TK1       | TWIST2   | WNT3A  |
| NR4A3 | PDGFRB | PMAIP1   | PSEN2   | RBBP8    | S100A6   | SLC19A1 | SOX7    | TAF7    | TLR10     | TXN      | WNT4   |
| NR5A1 | PDHA1  | PMEPAL   | PSG3    | RBL1     | S100B    | SLC1A3  | SOX9    | TAGLN   | TLR2      | TXNIP    | WNT5A  |
| NR5A2 | PDIAG  | PML      | PSG5    | RBL2     | S100P    | SLC20A1 | SP1     | TAP1    | TLR3      | TXNRD1   | WNT7B  |
| NRAS  | PDK1   | PNRC1    | PSIP1   | RBM38    | S1PR1    | SLC22A2 | SP100   | TAP2    | TLR6      | TYK2     | WRN    |
| NRCAM | PDK2   | PNRC2    | PSMB10  | RCC1     | SAA1     | SLC22A3 | SP3     | TAPBP   | TLR9      | TYMS     | WT1    |
| NRF1  | PDK4   | PODXL    | PSMB5   | RECK     | SALL4    | SLC22A8 | SP7     | TAT     | TLX1      | U2AF2    | WTAP   |
| NRIP1 | PDX1   | POLB     | PSMB9   | RECQL4   | SAMD4A   | SLC26A3 | SPARC   | TBP     | TMPO      | UBA7     | WWOX   |
| NT5E  | PEBP1  | POLD1    | PSMC5   | REEP5    | SAP30    | SLC29A1 | SP11    | TBX21   | TMPRSS2   | UBE2C    | XAF1   |
| NTF3  | PEG10  | POLD2    | PTBP1   | REG4     | SART3    | SLC2A1  | SPINK4  | TBX3    | TNC       | UBE2D3   | XBP1   |
| NTRK1 | PEG3   | POLH     | PTEN    | RELA     | SAT1     | SLC2A3  | SPP1    | TBX4    | TNF       | UBE2I    | XIAP   |
| NTRK3 | PELP1  | POLR3D   | PTGDS   | RELB     | SCARB1   | SLC2A4  | SPRR1B  | TBXA2R  | TNFAIP3   | UBE2S    | XPA    |
| NTS   | PENK   | POR      | PTGER4  | RELN     | SCD      | SLC39A1 | SPRR3   | TBXAS1  | TNFRSF10A | UCN      | XPC    |
| NUPR1 | PER1   | POSTN    | PTGES   | REN      | SCN9A    | SLC3A1  | SPRY1   | TCEAL1  | TNFRSF10B | UCP1     | XPO1   |
| OAS1  | PERP   | POU1F1   | PTGIR   | REST     | SCNN1A   | SLC4A2  | SPRY2   | TCF3    | TNFRSF11B | UCP2     | XRCC1  |
| OAT   | PF4    | POU2AF1  | PTGS1   | RET      | SDC4     | SLC5A1  | SQSTM1  | TCF4    | TNFRSF1B  | UGT1A1   | YBX1   |
| OCA2  | PFDN4  | POU2F1   | PTGS2   | RETN     | SDHB     | SLC5A5  | SRD5A3  | TCF7L2  | TNFRSF21  | UGT1A4   | YWHAQ  |
| ODC1  | PFKFB3 | POU4F1   | PTH     | RETNLB   | SELE     | SLC6A4  | SRF     | TCN2    | TNFSF10   | UGT1A6   | YY1    |
| OGG1  | PFKFB4 | POU4F2   | PTH1H   | RGS10    | SEMA6A   | SLC6A6  | SRPX    | TDO2    | TNFSF11   | UGT1A9   | ZEB1   |
| OGN   | PFKP   | POU5F1   | PTMA    | RGS4     | SERBP1   | SLC9A1  | SRR     | TEK     | TNFSF13B  | UGT2B15  | ZFHX3  |
| OPRM1 | PGA5   | PPARA    | PTN     | RHO      | SERPINB5 | SLC9A3  | SRSF1   | TERF1   | TOE1      | UGT2B17  | ZFP36  |
| OSM   | PGF    | PPARD    | PTP4A1  | RHOB     | SERPINB9 | SLCO1B3 | SRY     | TERT    | TOP1MT    | UGT2B7   | ZNF750 |
| OXT   | PGK1   | PPARG    | PTPA    | RLN1     | SERPINC1 | SLCO4C1 | SSTR2   | TF      | TOP2A     | UHRF1    | ZNF350 |
| OXTR  | PGR    | PPARGC1A | PTPN1   | RLN2     | SERPINE1 | SLPI    | ST3GAL1 | TFAM    | TOP3A     | UHRF1BP1 | ZNF217 |
| P4HA1 | PHB    | PIG      | PTPN13  | RNASEL   | SERPINF1 | SMAD3   | ST3GAL3 | TFAP2A  | TP53      | ULBP1    | ZNF175 |
| PADI1 | PHGDH  | PPM1D    | PTPN6   | RNF144A  | SES1     | SMAD4   | ST3GAL4 | TFAP4   | TP53BP2   | ULK1     | ZHX2   |
| PAEP  | PHLDA1 | PPP1R13B | PTPRC   | RNF2     | SETD2    | SMAD6   | ST3GAL5 | TFDP1   | TP53I3    | UPP1     |        |
| PARP1 | PIAS3  | PPP1R3C  | PTPRG   | RNF7     | SF1      | SMAD7   | ST6GAL1 | TFE3    | TP53INP1  | USP26    |        |
| PAX2  | PIGR   | PPP2CA   | PTPRO   | ROR1     | SFN      | SMARCA4 | STAR    | TFF1    | TP63      | USP7     |        |
| PAX3  | PIK3CA | PPP2R2B  | PTTG1   | RORA     | SFRP1    | SMARCB1 | STAT1   | TFPI2   | TP73      | UXT      |        |
| PAX5  | PIK3R3 | PPP2R2D  | PVR     | RP1      | SFRP5    | SMARCD3 | STAT2   | TFRC    | TPH1      | VCAM1    |        |
| PAX6  | PIM1   | PRAM1    | RACGAP1 | RPA2     | SFTPB    | SMN1    | STAT3   | TG      | TPO       | VCAN     |        |
| PAX8  | PIN1   | PRC1     | RAD21   | RPRM     | SFTPD    | SMYD1   | STAT4   | TGFA    | TPT1      | VDR      |        |
