# Supplementary material for: Bottom-Up Approach to the Discovery of Clinically Relevant Biomarker Genes: The Case of Colorectal Cancer
Source: MDPI journal article supplement (doi:10.3390/cancers14112654), 2022-05-27
Supplement: s1 [file s1]

**Table S10.** The 143 biomarkers identified following interrogation of TF and pathways databases, using the 10 genes from the training set.

|        |        |        |         |         |        |       |       |        |       |          |           |
|--------|--------|--------|---------|---------|--------|-------|-------|--------|-------|----------|-----------|
| ACTN4  | BCL2L1 | CCNE1  | CHUK    | ELK1    | GLS    | JAK1  | MDM2  | PDGFA  | PRKCA | SERPINB5 | TGFB2     |
| ADGRB1 | BID    | CCNG2  | COP1    | EP300   | GSK3B  | JAK2  | MET   | PDGFB  | PTEN  | SESN1    | TGFB3     |
| AKT1   | BRCA2  | CD82   | CREB1   | FAS     | HIF1A  | JUN   | MMP2  | PDGFC  | PTGS2 | SFN      | TGFBR2    |
| AKT2   | CASP3  | CDH1   | CREBBP  | FGF2    | HRAS   | KDR   | MSH2  | PDGFRA | PTPN1 | SHC1     | TJP1      |
| APAF1  | CASP8  | CDK2   | CSNK2A1 | FGFR1   | HSPB1  | KIT   | MYC   | PDGFRB | PTPN6 | SIAH1    | TLR2      |
| APC    | CASP9  | CDK4   | CTNNB1  | FGFR3   | IGF1   | KRAS  | NF1   | PDHA1  | RAD51 | SLC2A1   | TNFRSF10B |
| ATM    | CCNA1  | CDK6   | DDB2    | FLT3    | IGF1R  | LDHA  | NFKB1 | PKD1   | RB1   | SMAD3    | TP53I3    |
| AXIN2  | CCNB1  | CDKN1A | E2F1    | FN1     | IGFBP3 | LEF1  | NLK   | PFKP   | RELA  | SMAD4    | TSC2      |
| AXL    | CCNB2  | CDKN1B | E2F2    | FOS     | IL6    | LMO7  | NOS3  | PIK3CA | RET   | STAT1    | VEGFA     |
| BAD    | CCND1  | CDKN2A | E2F3    | FOXO3   | ILK    | MAPK1 | NRAS  | PIK3R3 | RPRM  | STAT3    | VEGFC     |
| BAX    | CCND2  | CHEK1  | EGF     | GADD45A | INSR   | MAPK3 | NTRK1 | PLD1   | RRM2  | TCF7L2   | WASF3     |
| BCL2   | CCND3  | CHEK2  | EGFR    | GCK     | IRS2   | MAPK8 | NTRK3 | PPM1D  | RRM2B | TGFB1    |           |
