# Supplementary material for: Bottom-Up Approach to the Discovery of Clinically Relevant Biomarker Genes: The Case of Colorectal Cancer
Source: MDPI journal article supplement (doi:10.3390/cancers14112654), 2022-05-27
Supplement: s1 [file s1]

**Table S14.** Expression of 42 selected mRNA tested in the excised CRC (patient 3).

| Biomarker | Normalised expression ratios 1 |            |            |         | Log-transformed normalised expression ratios |            |            |         | Confidence Limits |        | P-value |         |        |
|-----------|--------------------------------|------------|------------|---------|----------------------------------------------|------------|------------|---------|-------------------|--------|---------|---------|--------|
|           | 1st repeat                     | 2nd repeat | 3rd repeat | Average | 1st repeat                                   | 2nd repeat | 3rd repeat | Average | SD                | SEM    |         | From    | To     |
|           |                                |            |            |         |                                              |            |            |         |                   |        |         |         |        |
| CREB1     | 14.070                         | 13.920     | 13.840     | 13.943  | 3.8146                                       | 3.7991     | 3.7908     | 3.8015  | 0.0099            | 0.0057 | 3.7770  | 3.8259  | 0.0000 |
| SHC1      | 11.530                         | 11.700     | 12.940     | 12.057  | 3.5273                                       | 3.5484     | 3.6938     | 3.5898  | 0.0740            | 0.0427 | 3.4060  | 3.7737  | 0.0002 |
| CTNNB1    | 11.290                         | 10.570     | 11.010     | 10.957  | 3.4970                                       | 3.4019     | 3.4607     | 3.4532  | 0.0392            | 0.0226 | 3.3559  | 3.5505  | 0.0001 |
| PIK3R3    | 11.130                         | 9.240      | 10.420     | 10.263  | 3.4764                                       | 3.2079     | 3.3813     | 3.3552  | 0.1112            | 0.0642 | 3.0790  | 3.6313  | 0.0005 |
| PIK3CA    | 10.200                         | 8.800      | 10.490     | 9.830   | 3.3505                                       | 3.1375     | 3.3909     | 3.2930  | 0.1112            | 0.0642 | 3.0168  | 3.5692  | 0.0006 |
| CCND3     | 9.960                          | 9.420      | 9.300      | 9.560   | 3.3161                                       | 3.2357     | 3.2172     | 3.2564  | 0.0429            | 0.0248 | 3.1497  | 3.3630  | 0.0001 |
| EGF       | 9.090                          | 9.960      | 8.970      | 9.340   | 3.1843                                       | 3.3161     | 3.1651     | 3.2218  | 0.0671            | 0.0388 | 3.0550  | 3.3886  | 0.0002 |
| KRAS      | 8.170                          | 7.990      | 8.780      | 8.313   | 3.0303                                       | 2.9982     | 3.1342     | 3.0543  | 0.0580            | 0.0335 | 2.9100  | 3.1985  | 0.0002 |
| MDM2      | 8.230                          | 7.840      | 7.770      | 7.947   | 3.0409                                       | 2.9709     | 2.9579     | 2.9899  | 0.0365            | 0.0210 | 2.8993  | 3.0804  | 0.0001 |
| BID       | 7.890                          | 7.410      | 7.090      | 7.463   | 2.9800                                       | 2.8895     | 2.8258     | 2.8984  | 0.0633            | 0.0365 | 2.7412  | 3.0557  | 0.0002 |
| CDK6      | 6.990                          | 6.640      | 6.520      | 6.717   | 2.8053                                       | 2.7312     | 2.7049     | 2.7471  | 0.0425            | 0.0245 | 2.6415  | 2.8527  | 0.0001 |
| CDH1      | 6.770                          | 6.550      | 6.450      | 6.590   | 2.7592                                       | 2.7115     | 2.6893     | 2.7200  | 0.0291            | 0.0168 | 2.6476  | 2.7924  | 0.0001 |
| TGFBF2    | 5.430                          | 5.460      | 6.320      | 5.737   | 2.4410                                       | 2.4489     | 2.6599     | 2.5166  | 0.1014            | 0.0585 | 2.2647  | 2.7685  | 0.0008 |
| CCND1     | 5.440                          | 5.730      | 5.710      | 5.627   | 2.4436                                       | 2.5185     | 2.5135     | 2.4919  | 0.0342            | 0.0197 | 2.4069  | 2.5768  | 0.0001 |
| CDKN1B    | 5.370                          | 5.610      | 5.620      | 5.533   | 2.4249                                       | 2.4880     | 2.4906     | 2.4678  | 0.0304            | 0.0175 | 2.3924  | 2.5433  | 0.0001 |
| CCND2     | 5.490                          | 5.320      | 4.950      | 5.253   | 2.4568                                       | 2.4114     | 2.3074     | 2.3919  | 0.0625            | 0.0361 | 2.2365  | 2.5472  | 0.0003 |
| MAPK3     | 5.770                          | 4.920      | 4.020      | 4.903   | 2.5286                                       | 2.2987     | 2.0072     | 2.2781  | 0.2133            | 0.1232 | 1.7481  | 2.8082  | 0.0044 |
| TSC2      | 4.720                          | 5.310      | 4.400      | 4.810   | 2.2388                                       | 2.4087     | 2.1375     | 2.2617  | 0.1119            | 0.0646 | 1.9837  | 2.5397  | 0.0012 |
| E2F3      | 4.010                          | 4.530      | 4.790      | 4.443   | 2.0036                                       | 2.1795     | 2.2600     | 2.1477  | 0.1071            | 0.0618 | 1.8817  | 2.4137  | 0.0012 |
| IRS2      | 4.090                          | 4.460      | 4.350      | 4.300   | 2.0321                                       | 2.1570     | 2.1210     | 2.1034  | 0.0525            | 0.0303 | 1.9729  | 2.2338  | 0.0003 |
| EGFR      | 3.710                          | 3.580      | 3.560      | 3.617   | 1.8914                                       | 1.8400     | 1.8319     | 1.8544  | 0.0264            | 0.0152 | 1.7889  | 1.9199  | 0.0001 |
| FGFR1     | 3.770                          | 3.160      | 3.540      | 3.490   | 1.9146                                       | 1.6599     | 1.8237     | 1.7994  | 0.1054            | 0.0608 | 1.5376  | 2.0612  | 0.0017 |
| PDGFRB    | 2.750                          | 2.700      | 3.580      | 3.010   | 1.4594                                       | 1.4330     | 1.8400     | 1.5775  | 0.1859            | 0.1074 | 1.1155  | 2.0394  | 0.0069 |
| TGFB3     | 2.540                          | 2.340      | 3.610      | 2.830   | 1.3448                                       | 1.2265     | 1.8520     | 1.4744  | 0.2713            | 0.1566 | 0.8004  | 2.1485  | 0.0165 |
| PDGFC     | 2.550                          | 3.130      | 2.760      | 2.813   | 1.3505                                       | 1.6462     | 1.4647     | 1.4871  | 0.1217            | 0.0703 | 1.1847  | 1.7896  | 0.0033 |
| STAT1     | 3.930                          | 2.070      | 2.370      | 2.790   | 1.9745                                       | 1.0496     | 1.2449     | 1.4230  | 0.3980            | 0.2298 | 0.4341  | 2.4119  | 0.0370 |
| CDK2      | 2.480                          | 2.400      | 2.700      | 2.527   | 1.3103                                       | 1.2630     | 1.4330     | 1.3354  | 0.0716            | 0.0413 | 1.1575  | 1.5133  | 0.0014 |
| FN1       | 2.500                          | 2.370      | 2.340      | 2.403   | 1.3219                                       | 1.2449     | 1.2265     | 1.2644  | 0.0413            | 0.0239 | 1.1617  | 1.3671  | 0.0005 |
| CDK4      | 2.690                          | 2.170      | 2.280      | 2.380   | 1.4276                                       | 1.1177     | 1.1890     | 1.2448  | 0.1325            | 0.0765 | 0.9156  | 1.5740  | 0.0056 |
| HRAS      | 1.730                          | 1.510      | 1.440      | 1.560   | 0.7908                                       | 0.5945     | 0.5261     | 0.6371  | 0.1122            | 0.0648 | 0.3584  | 0.9158  | 0.0151 |
| CDKN1A    | 1.660                          | 1.070      | 1.270      | 1.333   | 0.7312                                       | 0.0976     | 0.3448     | 0.3912  | 0.2607            | 0.1505 | -0.2565 | 1.0389  | 0.1679 |
| BCL2      | 1.340                          | 1.160      | 1.260      | 1.253   | 0.4222                                       | 0.2141     | 0.3334     | 0.3233  | 0.0853            | 0.0492 | 0.1114  | 0.5351  | 0.0331 |
| MMP2      | 1.240                          | 1.170      | 1.240      | 1.217   | 0.3103                                       | 0.2265     | 0.3103     | 0.2824  | 0.0395            | 0.0228 | 0.1842  | 0.3806  | 0.0097 |
| BCL2L1    | 0.950                          | 1.120      | 1.220      | 1.097   | -0.0740                                      | 0.1635     | 0.2869     | 0.1255  | 0.1498            | 0.0865 | -0.2466 | 0.4975  | 0.3578 |
| TLR2      | 1.180                          | 1.060      | 0.540      | 0.927   | 0.2388                                       | 0.0841     | -0.8890    | -0.1887 | 0.4992            | 0.2882 | -1.4288 | 1.0514  | 0.6464 |
| CCNE1     | 0.730                          | 0.890      | 0.780      | 0.800   | -0.4540                                      | -0.1681    | -0.3585    | -0.3269 | 0.1188            | 0.0686 | -0.6221 | -0.0316 | 0.0602 |
| BAX       | 0.440                          | 0.360      | 0.360      | 0.387   | -1.1844                                      | -1.4739    | -1.4739    | -1.3774 | 0.1365            | 0.0788 | -1.7165 | -1.0384 | 0.0049 |
| CCNA1     | 0.320                          | 0.380      | 0.440      | 0.380   | -1.6439                                      | -1.3959    | -1.1844    | -1.4081 | 0.1878            | 0.1084 | -1.8745 | -0.9416 | 0.0088 |
| VEGFC     | 0.210                          | 0.340      | 0.160      | 0.237   | -2.2515                                      | -1.5564    | -2.6439    | -2.1506 | 0.4497            | 0.2596 | -3.2677 | -1.0335 | 0.0212 |
| BAD       | 0.240                          | 0.250      | 0.140      | 0.210   | -2.0589                                      | -2.0000    | -2.8365    | -2.2985 | 0.3812            | 0.2201 | -3.2455 | -1.3514 | 0.0135 |
| TGFB1     | 0.120                          | 0.120      | 0.190      | 0.143   | -3.0589                                      | -3.0589    | -2.3959    | -2.8379 | 0.3125            | 0.1804 | -3.6143 | -2.0615 | 0.0060 |
| SMAD4     | 0.140                          | 0.100      | 0.130      | 0.123   | -2.8365                                      | -3.3219    | -2.9434    | -3.0339 | 0.2083            | 0.1202 | -3.5513 | -2.5166 | 0.0023 |

\* Gene expression ratios (tumor v matching normal tissue) normalised to the endogenous levels of three reference RNAs (housekeeping gene GAPDH mRNA, 18S and 28S rRNAs). Measured in triplicate. Significantly upregulated mRNA (red), downregulated mRNAs (blue).
