# Supplementary material for: Bottom-Up Approach to the Discovery of Clinically Relevant Biomarker Genes: The Case of Colorectal Cancer
Source: MDPI journal article supplement (doi:10.3390/cancers14112654), 2022-05-27
Supplement: s1 [file s1]

**Table S9.** The genes identified as belonging to the 8 pathways, selected using the 10 genes from the validation set.

|         |         |         |          |        |          |         |         |        |          |         |           |
|---------|---------|---------|----------|--------|----------|---------|---------|--------|----------|---------|-----------|
| ACP1    | BCL2L11 | CDKN1B  | EIF4E1B  | GLS2   | JUN      | MSH3    | PDHB    | PMAIP1 | RALBP1   | SIRT3   | TGFB2     |
| ACTB    | BID     | CDKN2A  | EIF4E2   | GORAB  | KDR      | MSH6    | PKD1    | PPM1D  | RALGDS   | SIRT6   | TGFB3     |
| ACTG1   | BIRC5   | CHEK1   | EIF4EBP1 | GRB2   | KIT      | MTOR    | DPK1    | PPP3CA | RB1      | SLC16A3 | TGFBR1    |
| ACTN1   | BRAF    | CHEK2   | ELK1     | GSK3B  | KRAS     | MYC     | PERP    | PPP3CB | RCHY1    | SLC1A5  | TGFBR2    |
| ACTN4   | BRCA2   | CHUK    | EP300    | GTSE1  | LDHA     | NECTIN1 | PFKL    | PPP3CC | RELA     | SLC2A1  | THBS1     |
| ADGRB1  | CASP3   | COP1    | ERBB2    | HGF    | LEF1     | NECTIN2 | PFKM    | PPP3R1 | RET      | SLC2A2  | TIGAR     |
| AFDN    | CASP8   | CREB1   | ERBB3    | HIF1A  | LMO7     | NECTIN3 | PFKP    | PPP3R2 | RHOA     | SLC7A5  | TJP1      |
| AKT1    | CASP9   | CREBBP  | FARP2    | HK1    | MAP2K1   | NECTIN4 | PGAM1   | PRKCA  | RPRM     | SMAD2   | TLR2      |
| AKT2    | CCNA1   | CSNK2A1 | FAS      | HK2    | MAP2K2   | NF1     | PGAM2   | PRKCB  | RPS6     | SMAD3   | TNFRSF10B |
| AKT3    | CCNB1   | CSNK2A2 | FER      | HK3    | MAP3K7   | NFATC2  | PGAM4   | PRKCG  | RPS6KB1  | SMAD4   | TP53      |
| APAF1   | CCNB2   | CSNK2A3 | FGF2     | HKDC1  | MAPK1    | NFKB1   | PIDD1   | PTEN   | RPS6KB2  | SNAI1   | TP53AIP1  |
| APC     | CCNB3   | CSNK2B  | FGFR1    | HRAS   | MAPK10   | NLK     | PIK3CA  | PTGS2  | RRM2     | SNAI2   | TP53I3    |
| APC2    | CCND1   | CTNNA1  | FGFR2    | HSPB1  | MAPK11   | NOS3    | PIK3CB  | PTK2   | RRM2B    | SORBS1  | TP73      |
| APPL1   | CCND2   | CTNNA2  | FGFR3    | IDH1   | MAPK12   | NRAS    | PIK3CD  | PTPN1  | SCO2     | SOS1    | TSC2      |
| ARAF    | CCND3   | CTNNA3  | FLT3     | IGF1   | MAPK13   | NRG1    | PIK3R1  | PTPN6  | SERPINE5 | SOS2    | VCL       |
| ARHGEF6 | CCNE1   | CTNNB1  | FN1      | IGF1R  | MAPK14   | NRG2    | PIK3R2  | PTPRB  | SERPINE1 | SPHK1   | VEGFA     |
| ATM     | CCNE2   | CTNND1  | FOS      | IGFBP3 | MAPK3    | NTRK1   | PIK3R3  | PTPRF  | SESN1    | SPHK2   | VEGFC     |
| ATR     | CCNG1   | CYCS    | FOXO3    | IKKB   | MAPK8    | NTRK3   | PKM     | PTPRJ  | SESN2    | SRC     | WAS       |
| AXIN1   | CCNG2   | DCC     | FYN      | IKBK   | MAPK9    | PARD3   | PLA2G4A | PTPRM  | SESN3    | SSX2IP  | WASF1     |
| AXIN2   | CD82    | DDB2    | G6PD     | IL6    | MAPKAPK2 | PDGFA   | PLA2G4B | PXN    | SFN      | STAT1   | WASF2     |
| AXL     | CDC42   | E2F1    | GAB1     | IL6R   | MAPKAPK3 | PDGFB   | PLA2G4C | RAC1   | SH2D2A   | STAT3   | WASF3     |
| BAD     | CDH1    | E2F2    | GADD45A  | ILK    | MDM2     | PDGFC   | PLA2G4D | RAC2   | SHC1     | STEAP3  | WASL      |
| BAIAP2  | CDK1    | E2F3    | GADD45B  | INSR   | MDM4     | PDGFD   | PLA2G4E | RAC3   | SHC2     | TCF7    | YES1      |
| BAX     | CDK2    | EGF     | GADD45G  | IQGAP1 | MET      | PDGFRA  | PLA2G4F | RAD51  | SHC3     | TCF7L1  | ZMAT3     |
| BBC3    | CDK4    | EGFR    | GAS6     | IRS2   | MLH1     | PDGFRB  | PLCG1   | RAF1   | SHC4     | TCF7L2  | JMJD7-    |
| BCL2    | CDK6    | E124    | GCK      | JAK1   | MMP2     | PDHA1   | PLCG2   | RALA   | SHISA5   | TGFA    | PLA2G4B   |
| BCL2L1  | CDKN1A  | EIF4E   | GLS      | JAK2   | MSH2     | PDHA2   | PLD1    | RALB   | SHAH1    | TGFB1   |           |
