# Supplementary material for: Bottom-Up Approach to the Discovery of Clinically Relevant Biomarker Genes: The Case of Colorectal Cancer
Source: MDPI journal article supplement (doi:10.3390/cancers14112654), 2022-05-27
Supplement: s1 [file s1]

**Table S6.** The genes identified as belonging to the 13 pathways, selected using the 10 genes from the training set.

| ACP1     | BTK     | GADD45A  | MSH6     | INPP5A  | NPR1     | PLD1    | RAC3    | TP53      | BTRC     | TNFRSF13B | TP53AIIP1   |
|----------|---------|----------|----------|---------|----------|---------|---------|-----------|----------|-----------|-------------|
| ACTB     | CASP3   | E2F1     | HGF      | INPP5B  | NPY1R    | PLIN1   | RAD51   | TP73      | WASL     | SHC2      | PERP        |
| ACTG1    | CASP8   | E2F2     | NRG1     | INPP5D  | NRAS     | PMAIP1  | RAF1    | TP1       | MAP3K14  | RCHY1     | COP1        |
| ACTN4    | CASP9   | E2F3     | HIF1A    | INPPL1  | NTRK1    | PPP3CA  | RALA    | TSC2      | SH2D2A   | NECTIN3   | ZMAT3       |
| ACTN1    | CCNB1   | EGF      | HK1      | INSR    | NTRK3    | PPP3CB  | RALB    | TSHB      | MTMR6    | APPL1     | HHIP        |
| ADCY1    | CCND2   | EGFR     | HK2      | IRS1    | OCRL     | PPP3CC  | RALGDS  | TSHR      | MTMR7    | LAT       | MTMR14      |
| ADCY2    | CCND3   | EIF4E    | HK3      | ITGA4   | SERPINE1 | PPP3R1  | RB1     | VAV1      | MTMR4    | BBC3      | SMURF2      |
| ADCY3    | CCNE1   | EIF4EBP1 | HLA-DMA  | ITGB7   | PDE3B    | PPP3R2  | RELA    | VAV2      | SLC16A3  | INPP5J    | IPPK        |
| ADCY5    | CCNG1   | ELK1     | HLA-DMB  | ITPK1   | PDGFA    | PRKACA  | RET     | VCL       | CCNB2    | GLS2      | PIP4K2C     |
| ADCY6    | CCNG2   | EP300    | HLA-DOA  | ITPKA   | PDGFB    | PRKACB  | RP6     | VEGFA     | CCNE2    | SESN1     | HKDC1       |
| ADCY7    | CD28    | ERBB2    | HLA-DOB  | ITPKB   | PDGFRA   | PRKACG  | RP56KB1 | VEGFC     | MAPKAPK2 | CTNNA3    | ITPKC       |
| ADCY8    | CD80    | ERBB3    | HLA-DPA1 | JAK1    | PDGFRB   | PRKCA   | RP56KB2 | WAS       | ARHGEF6  | ICOS      | PDGFD       |
| ADCY9    | CD86    | EVC      | HLA-DPB1 | JAK2    | PDHA1    | PRKCB   | RRM2    | YES1      | EIF4E2   | RRM2B     | NECTIN4     |
| ADORA1   | CD40    | FABP4    | HLA-DQA1 | JUN     | PDHA2    | PRKCG   | MAPK12  | CXCR4     | EL24     | DHH       | TCF7L1      |
| ADRB1    | CD40LG  | FCER1A   | HLA-DQA2 | CD82    | PDHB     | PRKG1   | CCL25   | MAPKAPK3  | TP53I3   | CDON      | SESN2       |
| ADRB2    | CDK1    | MS4A2    | HLA-DQB1 | KDR     | PDK1     | PRKG2   | CXCL12  | SLC7A5    | NRG2     | ABHD5     | PLCD4       |
| ADRB3    | CDC42   | FCER1G   | HLA-DRA  | KIT     | PDPK1    | MAPK1   | MAP2K4  | MADCAM1   | MINPP1   | LEF1      | CCNB3       |
| GRK2     | CDH1    | FER      | HLA-DRB1 | KRAS    | PFKL     | MAPK3   | SHC1    | AXIN1     | PLCH2    | PLCE1     | PLCZ1       |
| GRK3     | CDK2    | FGF2     | HLA-DRB3 | LCP2    | PFKM     | MAPK8   | SHH     | AXIN2     | GAB2     | SHISA5    | BOC         |
| AKT1     | CDK4    | FGFR1    | HLA-DRB4 | LDHA    | PFKP     | MAPK11  | SHIAH   | PIP5K1A   | FARP2    | ISYNA1    | GORAB       |
| AKT2     | CDK6    | FGFR3    | HLA-DRB5 | LIPE    | PGAM1    | MAPK9   | SLC1A5  | PIP5K1B   | SCO2     | GTSE1     | PLCD3       |
| ALOX5    | CDKN1A  | FGFR2    | HRAS     | LMO7    | PGAM2    | MAPK10  | SLC2A1  | PIP4K2B   | AKT3     | SIRT6     | TNFRSF13C   |
| ALOX5AP  | CDKN1B  | FOXO3    | HSPB1    | LRP2    | SERPINE5 | MAPK13  | SLC2A2  | SPOP      | BCL2L11  | SUFU      | SSX2IP      |
| APAF1    | CDKN2A  | FLT3     | IDH1     | LTBR    | PIGR     | MAP2K1  | SLNA2   | CUL3      | WASF2    | NLK       | CSNK1A1L    |
| APC      | CGA     | FN1      | IGF1     | LYN     | PIK3C2A  | MAP2K2  | SMO     | CUL1      | APC2     | INPP5K    | PLA2G4E     |
| BIRC5    | CHEK1   | FOS      | IGF1R    | SMAD2   | PIK3C2B  | MAP2K3  | SNAI1   | IRS4      | CDIPT    | SHC3      | EVC2        |
| FAS      | CHUK    | MTOR     | IGFBP3   | SMAD3   | PIK3C2G  | MAP2K6  | SOS1    | PPM1D     | VAV3     | CSNK1G1   | PIP5KL1     |
| AQP7     | CREB1   | FYN      | IHH      | SMAD4   | PIK3C3   | MAP2K7  | SOS2    | PIK3R3    | BAIAP2   | CYC5      | SESN3       |
| ARAF     | CREBBP  | G6PD     | IKKB     | MDM2    | PIK3CA   | PTCH1   | SRC     | IKBK      | SORBS1   | BPNT2     | ADCY4       |
| RHOA     | MAPK14  | GAB1     | IL2      | MDM4    | PIK3CB   | PTEN    | STAT1   | PLA2G4C   | TNFSF13B | STEAP3    | PIKFYVE     |
| ARRB1    | CSF2    | GAS1     | IL3      | MET     | PIK3CD   | PTGER3  | STAT3   | PTCH2     | CCR9     | PI4K2B    | EIF4E1B     |
| ARRB2    | CSNK1A1 | GAS6     | IL4      | MLH1    | PIK3CG   | PTGS1   | SYK     | IRS2      | WASF3    | PI4K2A    | IPMK        |
| ATM      | CSNK1D  | GCK      | IL5      | AFDN    | PIK3R1   | PTGS2   | MAP3K7  | PLA2G4B   | GADD45G  | PIDD1     | PLA2G4F     |
| ATR      | CSNK1E  | GLI1     | IL6      | MMP2    | PIK3R2   | PTK2    | TCF7    | TNFSF13   | RALBP1   | MIOX      | CSNK2A3     |
| AXL      | CSNK1G2 | GLI2     | IL6R     | ALDH6A1 | PI4KA    | PTPN1   | TCF7L2  | MTMR1     | KIF3A    | MTMR8     | PLA2G4D     |
| BAD      | CSNK1G3 | GLI3     | IL10     | MSH2    | PI4KB    | PTPN6   | TGFA    | TNFRSF10B | PLAAT3   | PDGFC     | SPOPL       |
| ADGRB1   | CSNK2A1 | GLS      | IL13     | MSH3    | PIP4K2A  | PTPRB   | TGFB1   | INPP4B    | CHEK2    | PARD3     | KIF7        |
| BAX      | CSNK2A2 | GNAI1    | IL15     | MTM1    | PKM      | PTPRF   | TGFB2   | IQGAP1    | MGLL     | RPRM      | SHC4        |
| CCND1    | CSNK2B  | GNAI2    | IL15RA   | MYC     | PLA2G4A  | PTPRJ   | TGFB3   | SYNJ1     | PLCH1    | CCL28     | PGAM4       |
| BCL2     | CTNNA1  | GNAI3    | ILK      | GADD45B | PLCB2    | PTPRM   | TGFBR1  | SYNJ2     | PLCB1    | INPP5E    | JMID7-PLA2G |
| BCL2L1   | CTNNA2  | GNAS     | IMPA1    | NF1     | PLCB3    | NECTIN1 | TGFBR2  | SPHK1     | FBXW11   | SPHK2     | LOC10272340 |
| TNFRSF17 | CTNNB1  | SFN      | IMPA2    | NFATC2  | PLCB4    | NECTIN2 | THBS1   | MTMR3     | ICOSLG   | TIGAR     | LOC10272399 |
| BID      | CTNND1  | CCR10    | INPP1    | NFKB1   | PLCD1    | PXN     | TJP1    | MTMR2     | PIP5K1C  | PNPLA2    | TPTEP2-CSNK |
| BRAF     | DCC     | GRB2     | INS      | NOS3    | PLCG1    | RAC1    | TLR2    | CCNA1     | SIRT3    | SMURF1    |             |
| BRCA2    | DDB2    | GSK3B    | INPP4A   | NPY     | PLCG2    | RAC2    | TNF     | WASF1     | GPR161   | AICDA     |             |
