# Supplementary material for: Bottom-Up Approach to the Discovery of Clinically Relevant Biomarker Genes: The Case of Colorectal Cancer
Source: MDPI journal article supplement (doi:10.3390/cancers14112654), 2022-05-27
Supplement: s1 [file s1]

**Table S3.** The transcription factors identified in the *TRRUST* database using the 10 genes of the training set.

| Transcription Factor |            |  |
|----------------------|------------|--|----------------------|------------|--|----------------------|------------|--|----------------------|------------|--|
| Name                 | Frequency* |  | Name                 | Frequency1 |  | Name                 | Frequency* |  | Name                 | Frequency* |  |
| AATF                 | 1          |  | EGR1                 | 4          |  | HDAC2                | 2          |  | MSX2                 | 1          |  |
| ABL1                 | 2          |  | EHMT2                | 1          |  | HDAC3                | 1          |  | MTA1                 | 1          |  |
| AR                   | 6          |  | ELF1                 | 1          |  | HDAC4                | 1          |  | MXD1                 | 1          |  |
| ARID1A               | 1          |  | ELK1                 | 1          |  | HDAC7                | 1          |  | MYB                  | 4          |  |
| ATF1                 | 2          |  | ELL                  | 1          |  | HES1                 | 1          |  | MYC                  | 6          |  |
| ATF2                 | 1          |  | EP300                | 3          |  | HIF1A                | 3          |  | MYCN                 | 1          |  |
| ATF5                 | 1          |  | ERCC2                | 2          |  | HIPK2                | 1          |  | NCOA1                | 1          |  |
| ATF7                 | 1          |  | ERG                  | 1          |  | HNF4A                | 1          |  | NCOA3                | 2          |  |
| ATM                  | 2          |  | ESR1                 | 5          |  | HOXA1                | 1          |  | NELFCD               | 1          |  |
| BACH2                | 1          |  | ESR2                 | 1          |  | HSF1                 | 1          |  | NFIA                 | 1          |  |
| BCL6                 | 1          |  | ETS1                 | 4          |  | ING1                 | 1          |  | NFIB                 | 1          |  |
| BRCA1                | 2          |  | ETS2                 | 1          |  | ING2                 | 1          |  | NFIX                 | 1          |  |
| CBX8                 | 1          |  | ETV4                 | 3          |  | ING4                 | 2          |  | NFKB1                | 8          |  |
| CDX2                 | 1          |  | ETV6                 | 1          |  | IRF1                 | 3          |  | NPM1                 | 1          |  |
| CEBPA                | 1          |  | EW'SR1               | 1          |  | IRF2                 | 1          |  | NR1I2                | 1          |  |
| CEBPB                | 1          |  | EZH2                 | 3          |  | IRF9                 | 1          |  | NR3C1                | 1          |  |
| CHD8                 | 1          |  | FHL2                 | 1          |  | JUN                  | 2          |  | NRF1                 | 1          |  |
| CREB1                | 4          |  | FLI1                 | 2          |  | JUNB                 | 1          |  | NUPR1                | 2          |  |
| CREB3                | 1          |  | FOXA1                | 1          |  | JUND                 | 2          |  | PARP1                | 2          |  |
| CREBBP               | 1          |  | FOXG1                | 1          |  | KAT2B                | 1          |  | PAWR                 | 1          |  |
| CTCF                 | 1          |  | FOXO1                | 1          |  | KLF10                | 1          |  | PAX2                 | 1          |  |
| DBD2                 | 1          |  | FOXO3                | 1          |  | KLF14                | 1          |  | PAX3                 | 1          |  |
| DEK                  | 1          |  | FOXP3                | 2          |  | KLF16                | 1          |  | PAX5                 | 2          |  |
| DENND4A              | 1          |  | FUBP1                | 1          |  | KLF2                 | 2          |  | PER1                 | 1          |  |
| DMAP1                | 1          |  | GABPA                | 1          |  | KLF4                 | 2          |  | PGR                  | 3          |  |
| DNMT1                | 2          |  | GATA4                | 1          |  | KLF5                 | 1          |  | PML                  | 1          |  |
| DNMT3A               | 1          |  | GFI1                 | 1          |  | KLF6                 | 2          |  | POU5F1               | 1          |  |
| E2F1                 | 5          |  | GLI1                 | 3          |  | LCOR                 | 1          |  | PPARG                | 4          |  |
| E2F3                 | 1          |  | GLI2                 | 1          |  | MLLT10               | 1          |  | PTMA                 | 1          |  |
| EAPP                 | 1          |  | HBP1                 | 1          |  | MLLT3                | 1          |  | PURA                 | 1          |  |
| EBF3                 | 1          |  | HDAC1                | 2          |  |                      |            |  |                      |            |  |

\* The number of times given TF has been selected in the TRRUST database using the 10 genes of the training set.
