# Supplementary material for: Bottom-Up Approach to the Discovery of Clinically Relevant Biomarker Genes: The Case of Colorectal Cancer
Source: MDPI journal article supplement (doi:10.3390/cancers14112654), 2022-05-27
Supplement: s1 [file s1]

Table S2. RT-PCR and qPCR primers used in this investigation.

| Gene   | Forward Primer (RT-PCR and qPCR) |       |  | Reverse Primer (RT-PCR) |       |  | RT-PCR product |  |  | Reverse Primer (qPCR)     |       |  | qPCR product |  |
|--------|----------------------------------|-------|--|-------------------------|-------|--|----------------|--|--|---------------------------|-------|--|--------------|--|
|        | Sequence                         | Tm    |  | Sequence                | Tm    |  | length, bp     |  |  | Sequence                  | Tm    |  | length, bp   |  |
| BAD    | CAGTGACCTTCGCTCCACAT             | 60.04 |  | CATTTGGTAGTGAGCACGGC    | 59.55 |  | 359            |  |  | GACTCCGGATCTCCACAGC       | 59.56 |  | 101          |  |
| BAX    | GTGATGGACGGGTCCGGG               | 62.16 |  | GTCCATGTCCAGCCCATGA     | 60.03 |  | 429            |  |  | CACCTCGCTCAGCTTCTTGGT     | 60.32 |  | 170          |  |
| BCL2   | CCTTTGTGAACTGTACGGC              | 59.13 |  | CCGGCCAAACAACATGGAAG    | 59.5  |  | 521            |  |  | CCGTACAGTTCACAAAGGC       | 59.13 |  | 78           |  |
| BCL2L1 | GTTCAGACCAACCCTAGTCC             | 60.04 |  | GGCCCTTCTAGTCAGCCCTA    | 60.4  |  | 303            |  |  | CTCTGGGCGCATCTGTCTTGG     | 60.11 |  | 86           |  |
| BID    | CATGGACCGTAGCATCCCTC             | 59.97 |  | ACAGCTGTGACCACATCGAG    | 60.04 |  | 353            |  |  | TCCCTGTTCCGGTCTCTCC       | 60.3  |  | 90           |  |
| CCNA1  | GCTGCTAACTGCAAAATGGC             | 60.46 |  | TGCTTTGGGTCTGTGCCTTA    | 59.52 |  | 436            |  |  | CACAGTCAGGGAGTGCTTTCT     | 59.93 |  | 122          |  |
| CCND1  | AACTACTGGACCGCTTCTCT             | 60.54 |  | CATGGAGGGCGGATTGGAAA    | 60.4  |  | 360            |  |  | CAGGGGATGGTCTCCTTCA       | 60.62 |  | 111          |  |
| CCND2  | GCAGAAGACATCCAAACCCT             | 59.67 |  | AGCGAGCTCACTTCTCTCATC   | 59.54 |  | 528            |  |  | GGAAGACCTCTTCTTCGCACT     | 59.73 |  | 92           |  |
| CCND3  | CCTGGATCGCTACCTGTCTT             | 58.88 |  | GCGGGTACATGGCAAAGGTA    | 60.39 |  | 347            |  |  | GTTTTTCGATGGTCAGGGGC      | 59.47 |  | 119          |  |
| CCNE1  | TCACAGGGAGACCTTTTACTTGG          | 59.93 |  | ATTTGCTGGGGATACTGCGG    | 60.47 |  | 339            |  |  | ACAGCGTGGTCGGTGTAGAT      | 61.25 |  | 130          |  |
| CDH1   | GAAACAGCAAGGGCTTGA               | 59.59 |  | TCACGTGCTCAAAATCCTCCCT  | 61.94 |  | 362            |  |  | TGGGGGCTTCATTACATCC       | 60.03 |  | 146          |  |
| CDK2   | CTGCATCTTTGCTGAGATGGTGA          | 61.18 |  | TGAGTCCAAATAGCCCAAGGC   | 60.34 |  | 414            |  |  | AGAAGTAACCTCTGGCCACAC     | 59.65 |  | 127          |  |
| CDK4   | GTGTACAAGGCCGTGATCC              | 60.74 |  | AGGCCTCTTAGAAACTGGCG    | 59.75 |  | 326            |  |  | TCTCACACTCTTGAGGGCCA      | 60.47 |  | 85           |  |
| CDK6   | ACACCTTGTGGCTTATGG               | 59.96 |  | GCCTGGATTACCCACTCCAC    | 60.11 |  | 303            |  |  | GCGGTTTCTTGGAGAAGCA       | 60.89 |  | 119          |  |
| CDKN1A | CTCAAATCGTCCAGCGACT              | 60.11 |  | CCTGCCCTCGAGAGGTTTAC    | 59.82 |  | 344            |  |  | TGCTGACTCCTTGTTCGCG       | 59.97 |  | 87           |  |
| CDKN1B | GCTGAGGAACTGACGTGGAG             | 60.39 |  | CAAAACTCCCAAGCACCTCG    | 59.41 |  | 433            |  |  | TCAAACCCCTCCCCAAAATTGC    | 59.89 |  | 107          |  |
| CREB1  | TGAACGAAAGCAGTGACGGA             | 59.9  |  | ATGGCAGGTGCTGAAGTCTC    | 60.04 |  | 496            |  |  | ACAGCTGCATCTCCACTCTG      | 59.75 |  | 94           |  |
| CTNNB1 | GTACGGAGCCCTTCACATC              | 60.18 |  | TCCATACCCAAAGGCATCTCTG  | 59.15 |  | 478            |  |  | GCAGCTGCACAAAACAATGGA     | 59.97 |  | 90           |  |
| E2F3   | CTTACACCGACTCAGGGAG              | 60.11 |  | TACCATTGGGTGAGGCACAT    | 59    |  | 490            |  |  | GCAGCTGCACAAAACAATGGA     | 59.97 |  | 144          |  |
| EGF    | TTTCTGTGGCTTCCCTTGG              | 60.18 |  | GTGCAGGACCCACACAAGTA    | 59.89 |  | 352            |  |  | GCCCTGGGCGATCTTTTACT      | 60.03 |  | 104          |  |
| EGFR   | AATGCGTGGACAAAGTGCAAC            | 59.97 |  | GCGATGGACGGGATCTTAGG    | 60.04 |  | 340            |  |  | ATGTTCATGGCTGAGGCAG       | 60.4  |  | 106          |  |
| FGFR1  | GCCAGACAACCTGCCTTAT              | 60.03 |  | AGACACTGTTACCTGTCTGCG   | 60    |  | 389            |  |  | CACGTATACTCCCTGCGTC       | 59.97 |  | 121          |  |
| FN1    | AATGTCGTGGGGAATGGAC              | 60.03 |  | GTCACTTCTTGGTGGCCGTA    | 59.97 |  | 568            |  |  | CCCCTCTTCATGACGCTTGT      | 60.04 |  | 114          |  |
| HRAS   | GCTGACCCTCAGCTGATCC              | 60.53 |  | AGGCACTCTCCACTCCCTG     | 60.69 |  | 429            |  |  | CCCCTCAATGACCACCTGCT      | 60.03 |  | 91           |  |
| IRS2   | CGTCTCGGCCCTTATTGAA              | 59.82 |  | CAAACTGCCAAACCCGGAC     | 59.76 |  | 457            |  |  | GGCTCGGTGTGGACGTAAA       | 60.01 |  | 91           |  |
| KDR    | ACCCACGATCACAGGAAC               | 59.96 |  | TCCACAGGGATTGCTCCAAC    | 59.96 |  | 876            |  |  | n/a                       | n/a   |  | n/a          |  |
| KRAS   | TGAGATGGCATGGTGAGGTG             | 59.75 |  | TGTCGCTAATGGATTGGGCA    | 59.75 |  | 606            |  |  | TGATGTCCTCAAAATCAGAGTCTCT | 59.47 |  | 98           |  |
| MAPK3  | GACGGAGTATGTGGCTACGC             | 60.59 |  | CTTTGGAGTCTGACTTGGGGA   | 59.3  |  | 305            |  |  | GGAAGATGGCCGGTTAGAG       | 59.89 |  | 134          |  |
| MDM2   | GCTTCGGAACAAGAGACCCT             | 59.68 |  | TCCCCTGCCTGATACACAGT    | 60.25 |  | 794            |  |  | TTTGTGCACCAACAGACTTTAAT   | 57.41 |  | 73           |  |
| MMP2   | GAACCTCCGTCTGTCCAGG              | 60.04 |  | ACGACGGCATCCAGGTTATC    | 59.9  |  | 576            |  |  | GTCAATGTCAAGGAGAGGCC      | 60.11 |  | 70           |  |
| PDGFC  | CCTGGTTAAACGCTGTGGTG             | 59.41 |  | ACAGAACCACGCTAGTGGA     | 58.27 |  | 528            |  |  | CTTTGCTTGGGACACATTGACA    | 59.64 |  | 77           |  |
| PDGFRB | GTCTCCAACACTACATGGCCC            | 60.11 |  | AACCTTCGCCCAACAGTCTC    | 60.25 |  | 596            |  |  | TTGATCAAAAGTTGCTCGGCAG    | 59.46 |  | 78           |  |
| PIK3CA | TGTGAGCCTCCTTGCACAAA             | 60.11 |  | CTGAAGTACCCAGAAAGTGCT   | 59.37 |  | 324            |  |  | GGTGAATCGGCCATGTGGT       | 60.97 |  | 129          |  |
| PIK3R3 | CTCTTCCACCAAGCCACCT              | 59.89 |  | TGGACACTGGGTACATCAGC    | 59.39 |  | 378            |  |  | CCATCTGGCATATCCCGCAA      | 60.25 |  | 148          |  |
| PTEN   | GGAGACTTGGTCTCTCCCT              | 59.96 |  | ATGCTTTGAATCCAAAACCTTA  | 57.93 |  | 600            |  |  | n/a                       | n/a   |  | n/a          |  |
| SHC1   | GCCAACCCACATGCAATC               | 60.39 |  | GGGTCTCCTACAGGCAATGT    | 60.04 |  | 440            |  |  | GCTGTGTCCGGATCCCC         | 59.43 |  | 56           |  |
| SMAD4  | GGGACCGGATTACCCAGAC              | 59.82 |  | CTGAGCCATGCCTGACAAAT    | 60.32 |  | 343            |  |  | GGTCTGCAATCGCATGGTA       | 60.46 |  | 116          |  |
| STAT1  | TGGTGATCTCCAACGTGACG             | 60.04 |  | AACCGCATGGAAGTCAGGTT    | 59.89 |  | 527            |  |  | TCTGAAAAGCTGAGCCCCATCG    | 60.11 |  | 133          |  |
| TGFB1  | ACCTGCCACAGATCCCTAT              | 60.03 |  | GAGCAACACGGGTTACAGGTA   | 59.97 |  | 712            |  |  | AATAACCTAGATGGGCGCGA      | 58.95 |  | 68           |  |
| TGFB3  | TCGCAGTGCAGTGAGTTTCAT            | 59.97 |  | ATAGGGGACGTGGGTCTATCA   | 60.03 |  | 355            |  |  | CCTGGAGAGGAAGAGACCCC      | 60.69 |  | 56           |  |
| TGFBR2 | AAGTGTCTAGCTGCTTGTA              | 59.37 |  | TCTGACCTGTATCGGGGAA     | 59.66 |  | 679            |  |  | TTCTGTTGTACAGGTGGA        | 59.9  |  | 141          |  |
| TLR2   | GTATCTGCAAGGGCAGCTCA             | 60.11 |  | TATGCAGCCTCCGGATTGTT    | 59.45 |  | 855            |  |  | GCTGGCCAAATCAATCAAGACT    | 58.9  |  | 103          |  |
| TSC2   | GGGTCTGCAGATGAGAACTCC            | 58.87 |  | CCTCCTTGGTCTGTCTCACAT   | 63.2  |  | 322            |  |  | ACGTATCGAGCCATCATGTCC     | 60    |  | 101          |  |
| VEGFC  | GACCTGCCCCACCAATTACA             | 59.96 |  | CCTTCTGGCGGTTCTGATACAT  | 60.11 |  | 458            |  |  | CAGCTCCTTGTTTGGTCCAC      | 59.1  |  | 136          |  |
| GAPDH  | GGTCACCAGGGCTGCTTTTA             | 60.25 |  | TGTTTCACACCCCATGACGAA   | 60.5  |  |                |  |  | TTCCCGTTTCTCAGCCTTGAC     | 60.0  |  | 147          |  |
| RNA18s | CGTCTGCCCTATCAACTTTC             | 61.3  |  | n/a                     | n/a   |  | n/a            |  |  | TTTTCGTCACTACCTCCCC       | 61.5  |  | 120          |  |
| RNA28S | GGGGTGTGGGGTCTCTTCC              | 64.3  |  | n/a                     | n/a   |  | n/a            |  |  | GCGGCCCTCTCTACTCGTC       | 63.8  |  | 182          |  |
