# Supplementary material for: Bottom-Up Approach to the Discovery of Clinically Relevant Biomarker Genes: The Case of Colorectal Cancer
Source: MDPI journal article supplement (doi:10.3390/cancers14112654), 2022-05-27
Supplement: s1 [file s1]

**Table S11.** The 138 predicted biomarkers identified following interrogation of TF and pathways databases using the Training and, s

|        |        |        |         |         |        |       |       |        |          |        |           |
|--------|--------|--------|---------|---------|--------|-------|-------|--------|----------|--------|-----------|
| ACTN4  | BCL2L1 | CCNE1  | CHUK    | EP300   | GSK3B  | JAK2  | MMP2  | PDGFRA | PTPN1    | SIAH1  | TLR2      |
| ADGRB1 | BID    | CCNG2  | CREB1   | FAS     | HIF1A  | JUN   | MSH2  | PDGFRB | PTPN6    | SLC2A1 | TNFRSF10I |
| AKT1   | BRCA2  | CD82   | CREBBP  | FGF2    | HRAS   | KDR   | MYC   | PDHA1  | RAD51    | SMAD3  | TP53I3    |
| AKT2   | CASP3  | CDH1   | CSNK2A1 | FGFR1   | HSPB1  | KIT   | NF1   | PDK1   | RB1      | SMAD4  | TSC2      |
| APAF1  | CASP8  | CDK2   | CTNNB1  | FGFR3   | IGF1   | KRAS  | NFKB1 | PFKP   | RELA     | STAT1  | VEGFC     |
| APC    | CASP9  | CDK4   | DDB2    | FLT3    | IGF1R  | LDHA  | NLK   | PIK3CA | RET      | STAT3  | WASF3     |
| ATM    | CCNA1  | CDK6   | E2F1    | FN1     | IGFBP3 | LEF1  | NOS3  | PIK3R3 | RPRM     | TCF7L2 |           |
| AXIN2  | CCNB1  | CDKN1A | E2F2    | FOS     | IL6    | MAPK1 | NRAS  | PLD1   | RRM2     | TGFB1  |           |
| AXL    | CCNB2  | CDKN1B | E2F3    | FOXO3   | ILK    | MAPK3 | NTRK1 | PPM1D  | RRM2B    | TGFB2  |           |
| BAD    | CCND1  | CDKN2A | EGF     | GADD45A | INSR   | MAPK8 | PDGFA | PRKCA  | SERPINB5 | TGFB3  |           |
| BAX    | CCND2  | CHEK1  | EGFR    | GCK     | IRS2   | MDM2  | PDGFB | PTEN   | SFN      | TGFBR2 |           |
| BCL2   | CCND3  | CHEK2  | ELK1    | GLS     | JAK1   | MET   | PDGFC | PTGS2  | SHC1     | TJP1   |           |
