# Supplementary material for: Bottom-Up Approach to the Discovery of Clinically Relevant Biomarker Genes: The Case of Colorectal Cancer
Source: MDPI journal article supplement (doi:10.3390/cancers14112654), 2022-05-27
Supplement: s1 [file s1]

**Table S12.** Expression of 42 selected mRNA tested in the excised CRC (patient 1).

| Biomarker | Normalised expression ratios * |            |            |         | Log-transformed normalised expression ratios |            |            |         | Confidence Limits |        | P-value |         |
|-----------|--------------------------------|------------|------------|---------|----------------------------------------------|------------|------------|---------|-------------------|--------|---------|---------|
|           | 1st repeat                     | 2nd repeat | 3rd repeat | Average | 1st repeat                                   | 2nd repeat | 3rd repeat | Average | SD                | SEM    |         | From    |
| IRS2      | 15.400                         | 15.150     | 16.680     | 15.743  | 3.9449                                       | 3.9212     | 4.0600     | 3.9754  | 0.0606            | 0.0350 | 3.8247  | 4.1260  |
| BID       | 7.330                          | 7.940      | 7.230      | 7.500   | 2.8738                                       | 2.9891     | 2.8540     | 2.9056  | 0.0596            | 0.0344 | 2.7576  | 3.0537  |
| PIK3R3    | 5.280                          | 6.240      | 6.020      | 5.847   | 2.4005                                       | 2.6415     | 2.5898     | 2.5439  | 0.1036            | 0.0598 | 2.2866  | 2.8013  |
| TLR2      | 3.520                          | 4.660      | 3.560      | 3.913   | 1.8156                                       | 2.2203     | 1.8319     | 1.9559  | 0.1871            | 0.1080 | 1.4912  | 2.4207  |
| FN1       | 3.400                          | 4.290      | 3.330      | 3.673   | 1.7655                                       | 2.1010     | 1.7355     | 1.8673  | 0.1657            | 0.0956 | 1.4558  | 2.2789  |
| CDK2      | 2.620                          | 3.830      | 3.990      | 3.480   | 1.3896                                       | 1.9373     | 1.9964     | 1.7744  | 0.2732            | 0.1577 | 1.0957  | 2.4532  |
| PDGFRB    | 3.790                          | 3.170      | 3.090      | 3.350   | 1.9222                                       | 1.6645     | 1.6276     | 1.7381  | 0.1310            | 0.0757 | 1.4125  | 2.0637  |
| FGFR1     | 2.610                          | 2.750      | 2.710      | 2.690   | 1.3840                                       | 1.4594     | 1.4383     | 1.4273  | 0.0317            | 0.0183 | 1.3484  | 1.5061  |
| SHC1      | 2.230                          | 2.790      | 2.800      | 2.607   | 1.1570                                       | 1.4803     | 1.4854     | 1.3742  | 0.1536            | 0.0887 | 0.9927  | 1.7558  |
| E2F3      | 2.810                          | 2.790      | 2.200      | 2.600   | 1.4906                                       | 1.4803     | 1.1375     | 1.3694  | 0.1641            | 0.0947 | 0.9619  | 1.7770  |
| BCL2L1    | 2.310                          | 2.860      | 2.120      | 2.430   | 1.2079                                       | 1.5160     | 1.0841     | 1.2693  | 0.1816            | 0.1049 | 0.8181  | 1.7205  |
| CTNNB1    | 2.380                          | 2.310      | 2.520      | 2.403   | 1.2510                                       | 1.2079     | 1.3334     | 1.2641  | 0.0521            | 0.0301 | 1.1347  | 1.3935  |
| CDK4      | 2.290                          | 2.260      | 2.530      | 2.360   | 1.1953                                       | 1.1763     | 1.3391     | 1.2369  | 0.0727            | 0.0420 | 1.0564  | 1.4175  |
| CDK6      | 2.320                          | 2.570      | 2.100      | 2.330   | 1.2141                                       | 1.3618     | 1.0704     | 1.2154  | 0.1190            | 0.0687 | 0.9199  | 1.5110  |
| CDKN1B    | 1.500                          | 1.900      | 1.720      | 1.707   | 0.5850                                       | 0.9260     | 0.7824     | 0.7645  | 0.1398            | 0.0807 | 0.4171  | 1.1118  |
| BAD       | 1.550                          | 1.710      | 1.750      | 1.670   | 0.6323                                       | 0.7740     | 0.8074     | 0.7379  | 0.0759            | 0.0438 | 0.5493  | 0.9264  |
| TGFB1     | 1.800                          | 1.830      | 1.220      | 1.617   | 0.8480                                       | 0.8718     | 0.2869     | 0.6689  | 0.2703            | 0.1561 | -0.0026 | 1.3404  |
| VEGFC     | 1.790                          | 1.570      | 1.390      | 1.583   | 0.8400                                       | 0.6508     | 0.4751     | 0.6553  | 0.1490            | 0.0860 | 0.2851  | 1.0254  |
| CREB1     | 1.700                          | 1.850      | 1.140      | 1.563   | 0.7655                                       | 0.8875     | 0.1890     | 0.6140  | 0.3046            | 0.1759 | -0.1427 | 1.3708  |
| CCND1     | 1.670                          | 1.600      | 1.000      | 1.423   | 0.7398                                       | 0.6781     | 0.0000     | 0.4726  | 0.3352            | 0.1935 | -0.3600 | 1.3053  |
| MDM2      | 1.610                          | 1.630      | 0.660      | 1.300   | 0.6871                                       | 0.7049     | -0.5995    | 0.2642  | 0.6107            | 0.3526 | -1.2531 | 1.7814  |
| MMP2      | 1.620                          | 1.140      | 0.870      | 1.210   | 0.6960                                       | 0.1890     | -0.2009    | 0.2280  | 0.3672            | 0.2120 | -0.6842 | 1.1403  |
| EGF       | 0.790                          | 1.600      | 1.090      | 1.160   | -0.3401                                      | 0.6781     | 0.1243     | 0.1541  | 0.4162            | 0.2403 | -0.8798 | 1.1881  |
| STAT1     | 1.060                          | 1.300      | 0.930      | 1.097   | 0.0841                                       | 0.3785     | -0.1681    | 0.0829  | 0.1988            | 0.1148 | -0.3747 | 0.6133  |
| CCND2     | 0.890                          | 1.500      | 0.890      | 1.093   | -0.1681                                      | 0.5850     | -0.1681    | 0.0714  | 0.3550            | 0.2050 | -0.7991 | 0.9649  |
| CDKN1A    | 1.180                          | 1.130      | 0.870      | 1.060   | 0.2388                                       | 0.1763     | -0.2009    | 0.0264  | 0.1942            | 0.1121 | -0.4111 | 0.5539  |
| CCNE1     | 0.730                          | 1.080      | 1.340      | 1.050   | -0.4540                                      | 0.1110     | 0.4222     | 0.0264  | 0.3627            | 0.2094 | -0.8747 | 0.9275  |
| CDH1      | 0.560                          | 1.540      | 0.880      | 0.993   | -0.8365                                      | 0.6229     | -0.1844    | -0.1327 | 0.5969            | 0.3446 | -1.6156 | 1.3503  |
| TGFB2     | 0.880                          | 0.830      | 1.030      | 0.913   | -0.1844                                      | -0.2688    | 0.0426     | -0.1369 | 0.1315            | 0.0759 | -0.4636 | 0.1899  |
| CCNA1     | 1.000                          | 0.660      | 1.010      | 0.890   | 0.0000                                       | -0.5995    | 0.0144     | -0.1950 | 0.2860            | 0.1651 | -0.9056 | 0.5156  |
| BAX       | 0.850                          | 1.220      | 0.540      | 0.870   | -0.2345                                      | 0.2869     | -0.8890    | -0.2789 | 0.4811            | 0.2777 | -1.4740 | 0.9163  |
| TSC2      | 0.680                          | 0.930      | 0.910      | 0.840   | -0.5564                                      | -0.1047    | -0.1361    | -0.2657 | 0.2059            | 0.1189 | -0.7773 | 0.2459  |
| TGFB3     | 0.890                          | 0.930      | 0.600      | 0.807   | -0.1681                                      | -0.1047    | -0.7370    | -0.3366 | 0.2843            | 0.1641 | -1.0429 | 0.3697  |
| MAPK3     | 0.440                          | 0.790      | 0.620      | 0.617   | -1.1844                                      | -0.3401    | -0.6897    | -0.7381 | 0.3464            | 0.2000 | -1.5986 | 0.1225  |
| PDGFC     | 0.610                          | 0.650      | 0.540      | 0.600   | -0.7131                                      | -0.6215    | -0.8890    | -0.7412 | 0.1110            | 0.0641 | -1.0169 | -0.4655 |
| BCL2      | 0.540                          | 0.780      | 0.310      | 0.543   | -0.8890                                      | -0.3585    | -1.6897    | -0.9790 | 0.5472            | 0.3159 | -2.3384 | 0.3804  |
| SMAD4     | 0.470                          | 0.540      | 0.510      | 0.507   | -1.0893                                      | -0.8890    | -0.9714    | -0.9832 | 0.0822            | 0.0475 | -1.1874 | -0.7790 |
| EGFR      | 0.290                          | 0.470      | 0.410      | 0.390   | -1.7859                                      | -1.0893    | -1.2863    | -1.3871 | 0.2932            | 0.1693 | -2.1155 | -0.6588 |
| KRAS      | 0.340                          | 0.450      | 0.330      | 0.373   | -1.5564                                      | -1.1520    | -1.5995    | -1.4360 | 0.2016            | 0.1164 | -1.9367 | -0.9352 |
| CCND3     | 0.220                          | 0.310      | 0.430      | 0.320   | -2.1844                                      | -1.6897    | -1.2176    | -1.6972 | 0.3947            | 0.2279 | -2.6779 | -0.7165 |
| PIK3CA    | 0.140                          | 0.380      | 0.370      | 0.297   | -2.8365                                      | -1.3959    | -1.4344    | -1.8889 | 0.6702            | 0.3869 | -3.5540 | -0.2239 |
| HRAS      | 0.200                          | 0.330      | 0.310      | 0.280   | -2.3219                                      | -1.5995    | -1.6897    | -1.8704 | 0.3214            | 0.1856 | -2.6689 | -1.0718 |

\* Gene expression ratios (tumor v matching normal tissue) normalised to the endogenous levels of three reference RNAs (housekeeping gene GAPDH mRNA, 18S and 28S rRNAs). Measured in triplicate. Significantly upregulated mRNA (red), downregulated mRNAs (blue).
