# Supplementary material for: Bottom-Up Approach to the Discovery of Clinically Relevant Biomarker Genes: The Case of Colorectal Cancer
Source: MDPI journal article supplement (doi:10.3390/cancers14112654), 2022-05-27
Supplement: s1 [file s1]

**Table S15.** Summary of the predicted and tested markers.

| Gene          | Gene name                                                                                                                                                                                                                                                                                                                                                                                                                                                                                                                                                                                                                                                                                                                                                                                                                                                                                                   | mRNA sequence | Uniprot ID | Uniprot Name | Functional category              | Protein location(s)                                 |
|---------------|-------------------------------------------------------------------------------------------------------------------------------------------------------------------------------------------------------------------------------------------------------------------------------------------------------------------------------------------------------------------------------------------------------------------------------------------------------------------------------------------------------------------------------------------------------------------------------------------------------------------------------------------------------------------------------------------------------------------------------------------------------------------------------------------------------------------------------------------------------------------------------------------------------------|---------------|------------|--------------|----------------------------------|-----------------------------------------------------|
| <b>BAD</b>    | Bcl2-associated agonist of cell death                                                                                                                                                                                                                                                                                                                                                                                                                                                                                                                                                                                                                                                                                                                                                                                                                                                                       | NM_004322.3   | Q92934     | BAD_HUMAN    | Promotes apoptosis               | Cytosol, mitochondrion outer membrane               |
|               | This is a member of the BCL-2 family, which are regulators of programmed cell death. Primary mode of function is via antagonizing Bcl2-mediated repression of cell death, which promotes apoptosis. BAD is mentioned in publications in relation to CRC. Published evidence presents BAD as a regulator of apoptosis in cancers (largely in breast, lung, liver cancers, CRC, Neuroendocrine Tumors).                                                                                                                                                                                                                                                                                                                                                                                                                                                                                                       |               |            |              |                                  |                                                     |
| <b>BAX</b>    | Apoptosis regulator BAX                                                                                                                                                                                                                                                                                                                                                                                                                                                                                                                                                                                                                                                                                                                                                                                                                                                                                     | NM_138761.3   | Q07812     | BAX_HUMAN    | Mitochondrial apoptosis          | Cytosol, mitochondrion outer membrane               |
|               | This is a member of the BCL-2 family, which are regulators of programmed cell death. Primary function is by translocation to the mitochondrion membrane under stress conditions, leading to the release of cytochrome c and mitochondrial apoptosis. BAX is mentioned in publications in relation to CRC. Published evidence presents BAX as a regulator of apoptosis in multiple cancers (mostly in breast, lung, stomach, liver, lung cancers and CRC).                                                                                                                                                                                                                                                                                                                                                                                                                                                   |               |            |              |                                  |                                                     |
| <b>BCL2</b>   | Apoptosis regulator Bcl-2                                                                                                                                                                                                                                                                                                                                                                                                                                                                                                                                                                                                                                                                                                                                                                                                                                                                                   | NM_138761.3   | P10415     | BCL2_HUMAN   | Suppresses apoptosis             | Cytosol, mitochondrion outer membrane, ER membrane  |
|               | Inhibitor of autophagy during non-starvation conditions, BCL2 binds to the apoptosis-activating factor (APAF-1), prevents the release of cytochrome C from the mitochondria, inhibits caspase activity, suppresses apoptosis. BCL2 is reported to play role in Leukemia, non-Hodgkin lymphoma. Numerous publications mention BCL2 as a regulator of apoptosis and prognostic factor in multiple cancers (mostly in B-Cell Lymphoma, breast cancer, lung cancer, and skin cancer). Few past reports point towards correlation between BCL2 downregulation and apoptosis, including in cancer cells. BCL2 expression detected by immunohistochemistry in paraffin-embedded tissues was reported to not have prognostic significance and to not correlate with the stage of CRC. Seldom mentioned in publications in relation to gastric cancer.                                                               |               |            |              |                                  |                                                     |
| <b>BCL2L1</b> | Bcl-2-like protein 1                                                                                                                                                                                                                                                                                                                                                                                                                                                                                                                                                                                                                                                                                                                                                                                                                                                                                        | NM_001191.2   | Q07817     | B2CL1_HUMAN  | May promote or inhibit apoptosis | Cytoskeleton, cytosol, outer mitochondrial membrane |
|               | This is a member of the BCL-2 family, which are regulators of programmed cell death. It binds to and blocks the voltage-dependent anion channel (VDAC), inhibits cell death. Regulator of G2 checkpoint. The longer isoform acts as an apoptotic inhibitor and the shorter isoform acts as an apoptotic activator. BCL2L1 is mentioned in publications in relation to apoptosis and its regulation, also the role of alternative splicing (limited to breast, lung, ovarian and skin cancers). No genetic alteration in CRC reported, but protein expression could be associated with chromosome 20q gain. Overexpression in CRC is seldom mentioned in publications in relation to CRC. Few past reports mentioned correlation between suppression of tumorigenesis in gastric cancer and BCL2L1 downregulation in response to treatment or tumor progression in CRC when BCL2L1 expression was increased. |               |            |              |                                  |                                                     |
| <b>BID</b>    | BH3-interacting domain death agonist                                                                                                                                                                                                                                                                                                                                                                                                                                                                                                                                                                                                                                                                                                                                                                                                                                                                        | NM_197966.2   | A8ASI8     | A8ASI8_HUMAN | Induces apoptosis                | Cytosol                                             |
|               | The main function of this gene is to encode cell death. A pro-apoptotic member of the Bcl-2 family, known to induce caspases and apoptosis. Has been mentioned in relation to drug-induced apoptosis. Counters the protective effect of BCL2. Few past reports mention correlation between changes in BID expression levels and apoptosis, usually in response to treatments. Correlation between high expression of BID and overall survival rates in colon cancer has been reported.                                                                                                                                                                                                                                                                                                                                                                                                                      |               |            |              |                                  |                                                     |

**Table S15** (cont.) Summary of the predicted and tested markers.

| Gene         | Gene name                                                                                                                                                                                                                                                                                                                                                                                                                                                                                                                                                                                                                       | mRNA sequence  | Uniprot ID | Uniprot Name | Functional category         | Protein location(s) |
|--------------|---------------------------------------------------------------------------------------------------------------------------------------------------------------------------------------------------------------------------------------------------------------------------------------------------------------------------------------------------------------------------------------------------------------------------------------------------------------------------------------------------------------------------------------------------------------------------------------------------------------------------------|----------------|------------|--------------|-----------------------------|---------------------|
| <b>CCNA1</b> | Cyclin-A1                                                                                                                                                                                                                                                                                                                                                                                                                                                                                                                                                                                                                       | NM_003914.3    | P78396     | CCNA1_HUMAN  | Regulation of cell cycle    | Nucleus             |
|              | This is part of the cyclin family, whos main function is to regulate CDK kinases. Involved in control of the cell cycle at the G1/S (start) and G2/M (mitosis) transitions. Binds to CDK2 and CDC2. Limited number of reports link CCNA1 to cancer, such as head and neck cancer, breast, cervical, lung, bladder and skin cancers, leukemia, but not CRC or related cancers.                                                                                                                                                                                                                                                   |                |            |              |                             |                     |
| <b>CCND1</b> | G1/S-specific cyclin-D1                                                                                                                                                                                                                                                                                                                                                                                                                                                                                                                                                                                                         | NM_053056.2    | P24385     | CCND1_HUMAN  | Regulation of cell cycle    | Cytoplasm, nucleus  |
|              | This is part of the cyclin family, whos main function is to regulate CDK kinases. Regulates the cell-cycle during G1/S transition. Acts as a regulator of CDK4 and CDK6 subunits. Is reported to play a role in multiple myeloma. Often mentioned in publications in relation to aberrations in the cell cycle related genes, or their differential expression in multiple cancers (mantle-cell lymphoma, breast and lung cancer). Some published evidence links CCND1 to rectal neoplasms.                                                                                                                                     |                |            |              |                             |                     |
| <b>CCND2</b> | G1/S-specific cyclin-D2                                                                                                                                                                                                                                                                                                                                                                                                                                                                                                                                                                                                         | NM_001759.3    | P30279     | CCND2_HUMAN  | Regulation of cell cycle    | Cytoplasm, nucleus  |
|              | This is part of the cyclin family, whos main function is to regulate CDK kinases. Regulates the cell-cycle during G1/S transition. Acts as a regulator of CDK4 and CDK6 subunits. Is reported to play a role in megaloecephaly-polymicrogyria-polydactyly-hydrocephalus syndrome. Overexpressed and hypermethylated in ovarian, breast and testicular tumors. Inhibition may lead to suppression of tumors. Mentioned in relation to breast cancer, non-Hodgkin lymphoma, multiple myeloma, mantle-cell lymphoma, bladder cancer, stomach cancer.                                                                               |                |            |              |                             |                     |
| <b>CCND3</b> | G1/S-specific cyclin-D3                                                                                                                                                                                                                                                                                                                                                                                                                                                                                                                                                                                                         | NM_001136017.2 | P30281     | CCND3_HUMAN  | Regulation of cell cycle    | Cytoplasm, nucleus  |
|              | This is part of the cyclin family, whos main function is to regulate CDK kinases. Regulates the cell-cycle during G1/S transition. Acts as a regulator of CDK4 and CDK6 subunits. Some evidence links this cyclin to non-Hodgkin lymphoma, mantle-cell lymphoma, multiple myeloma, breast cancer, uterine sarcoma. Mutations in the gene drive cell proliferation. Few past reports link CCND3 with gastric sarcoma and stomach cancer.                                                                                                                                                                                         |                |            |              |                             |                     |
| <b>CCNE1</b> | G1/S-specific cyclin-E1                                                                                                                                                                                                                                                                                                                                                                                                                                                                                                                                                                                                         | NM_001238.2    | P24864     | CCNE1_HUMAN  | Regulation of cell cycle    | Nucleus             |
|              | This is part of the cyclin family, whos main function is to regulate CDK kinases. Controls cell cycle at the G1/S transition. Acts as a regulator of CDK2 subunit. Overexpression results in chromosome instability and contributes to tumorigenesis. Mentioned in relation to breast and liver cancers, osteosarcoma. Few past reports documented correlation between upregulation of CCNE1 and CRC aggressiveness or proliferation. Downregulation of CCNE1 has been reported to correlate with increased drug sensitivity in gastric sarcoma. Gene amplification reported in gastric cancer and metastasized gastric cancer. |                |            |              |                             |                     |
| <b>CDH1</b>  | Cadherin-1                                                                                                                                                                                                                                                                                                                                                                                                                                                                                                                                                                                                                      | NM_004360.3    | P12830     | CADH1_HUMAN  | Regulation of cell adhesion | Plasma membrane     |
|              | Transmembrane calcium-dependent cell adhesion protein. Reported to play a role in hereditary diffuse gastric cancer, endometrial cancer, ovarian cancer, lobular breast cancer, blepharocheilodontic syndrome. Mutations and loss of function correlate with cancer progression by increasing proliferation, invasion, and/or metastasis. Widely studied in relation to stomach, breast, gastric and colorectal cancers. Also linked to lung, liver, prostate, ovarian, cervical, bladder and other cancers.                                                                                                                    |                |            |              |                             |                     |
| <b>CDK2</b>  | Cyclin-dependent kinase 2                                                                                                                                                                                                                                                                                                                                                                                                                                                                                                                                                                                                       | NM_001798.3    | P24941     | CDK2_HUMAN   | Regulation of cell cycle    | Cytoplasm, nucleus  |
|              | Part of the serine/threonine protein kinases that regulate cell cycle. Control of the cell cycle during meiosis; critical for G1 to S phase transition. Limited published evidence links CDK2 to breast, skin, cervical and small cell lung cancers. Correlation between CDK2 activity and colorectal cancer progression has been reported. Modulation of CDK2 pathway may be used to inhibit cancer development and progression. Targeting CDK2 pathway has a potential as therapeutic strategy in CRC.                                                                                                                        |                |            |              |                             |                     |









**Table S15** (cont.) Summary of the predicted and tested markers.

| Gene           | Gene name                                                                                                                                                                                                                                                                                                                                                                                                                                                                                                                                                                                                                                           | mRNA sequence | Uniprot ID | Uniprot Name | Functional category            | Protein location(s) |
|----------------|-----------------------------------------------------------------------------------------------------------------------------------------------------------------------------------------------------------------------------------------------------------------------------------------------------------------------------------------------------------------------------------------------------------------------------------------------------------------------------------------------------------------------------------------------------------------------------------------------------------------------------------------------------|---------------|------------|--------------|--------------------------------|---------------------|
| <b>TGFBFR2</b> | TGF-beta receptor type-2<br>Regulates cell cycle arrest in epithelial and hematopoietic cells, controls mesenchymal cell proliferation and differentiation, wound healing, extracellular matrix production, immunosuppression and carcinogenesis. Implicated in hereditary non-polyposis colorectal cancer, esophageal cancer, Loey's-Dietz syndrome. Widely reported as being associated with CRC and hereditary nonpolyposis CRC, stomach, lung, breast, pancreatic and thyroid cancers. Mutations in this gene have been associated with Marfan syndrome, Loey's-Dietz aortic aneurysm syndrome, and the development of various types of tumors. | NM_003242.6   | P37173     | TGFR2_HUMAN  | Signal transduction            | Plasma membrane     |
| <b>TLR2</b>    | Toll-like receptor 2<br>Toll-like receptor, involved in pathogen recognition and activation of innate immunity, may promote apoptosis. Limited published evidence of involvement in CRC and gastric cancer, also liver, breast and prostate cancers. Implicated in the pathogenesis of several autoimmune diseases.                                                                                                                                                                                                                                                                                                                                 | NM_003264.3   | O60603     | TLR2_HUMAN   | Activation of innate immunity  | Plasma membrane     |
| <b>TSC2</b>    | Tuberlin<br>A GTPase-activating protein for the small GTPase, a tumor suppressor. Function is affected by mutations. Implicated in lymphangioleiomyomatosis, focal cortical dysplasia. Mutations in this gene lead to tuberous sclerosis complex. Published evidence links TSC2 with kidney, lung, bladder cancers, childhood brain tumors and uterine sarcoma. Limited published evidence links genetic variations to CRC risk.                                                                                                                                                                                                                    | NM_000548.3   | P49815     | TSC2_HUMAN   | Tumor suppressor, signaling    | Cytoplasm           |
| <b>VEGFC</b>   | Vascular endothelial growth factor C<br>Platelet-derived growth factor active in angiogenesis, endothelial cell growth, proliferation and migration, maintains differentiated lymphatic endothelium in adults, may affect the permeability of blood vessels. Implicated in lymphatic malformation. Published evidence links VEGFC to breast, lung, stomach, prostate, bladder cancers, and neuroblastoma. Limited evidence exists of upregulation of VEGFC in primary CRC. Downregulation may lead to the inhibition of tumorigenesis, angiogenesis, and lymphangiogenesis.                                                                         | NM_005429.2   | P49767     | VEGFC_HUMAN  | Platelet Derived Growth Factor | Extracellular       |
