# Supplementary material for: Bottom-Up Approach to the Discovery of Clinically Relevant Biomarker Genes: The Case of Colorectal Cancer
Source: MDPI journal article supplement (doi:10.3390/cancers14112654), 2022-05-27
Supplement: s1 [file s1]

**Table S5.** A subset of pathways identified using the 10 genes of the training set and selected for further analysis.

| Pathway  | Function                                     |
|----------|----------------------------------------------|
| hsa01521 | EGFR tyrosine kinase inhibitor resistance    |
| hsa04520 | Adherens junction                            |
| hsa00562 | Inositol phosphate metabolism                |
| hsa04115 | p53 signaling pathway                        |
| hsa04664 | Fc epsilon RI signaling pathway              |
| hsa05230 | Central carbon metabolism in cancer          |
| hsa05212 | Pancreatic cancer                            |
| hsa05210 | Colorectal Cancer                            |
| hsa04370 | VEGF signaling pathway                       |
| hsa04923 | Regulation of lipolysis in adipocytes        |
| hsa05213 | Endometrial cancer                           |
| hsa04672 | Intestinal immune network for IgA production |
| hsa04340 | Hedgehog signaling pathway                   |
